# Supplementary material for: A clear trade-off exists between the theoretical efficiency and acceptability of dietary changes that improve nutrient adequacy during early pregnancy in French women: Combined data from simulated changes modeling and online assessment survey
Source: PLoS One. 2018 Apr 11;13(4):e0194764. doi: 10.1371/journal.pone.0194764 (PMC5895017; doi:10.1371/journal.pone.0194764)
Supplement: S11 Table — (XLSX) [file pone.0194764.s011.xlsx]

## Sheet: #LN00009
indiv_id	dietchange_id	presmoment	Apr_Apost	Easy_implementation	Intention_use	Type	monade	motivation	parity	easy_imp_bin
39A8-C4CU	C11	1	0	3	1	2	3	1	0	1
39A8-C4CU	C21	1	0	4	1	2	3	1	0	1
39A8-C4CU	C31	1	0	1	0	3	3	1	0	0
39A8-C4CU	C42	1	0	1	0	3	3	1	0	0
39A8-C4CU	C51	1	0	4	1	4	3	1	0	1
39A8-C4CU	C61	1	0	3	1	4	3	1	0	1
3YRQ-FEM3	A11	2	0	3	1	2	3	6	1	1
3YRQ-FEM3	A11	2	1	2	0	2	3	6	1	0
3YRQ-FEM3	A21	2	0	3	1	2	3	6	1	1
3YRQ-FEM3	A21	2	1	4	1	2	3	6	1	1
3YRQ-FEM3	A31	2	0	1	0	3	3	6	1	0
3YRQ-FEM3	A31	2	1	3	1	3	3	6	1	1
3YRQ-FEM3	A41	2	0	2	1	3	3	6	1	0
3YRQ-FEM3	A41	2	1	4	1	3	3	6	1	1
3YRQ-FEM3	A51	2	0	3	1	4	3	6	1	1
3YRQ-FEM3	A51	2	1	4	1	4	3	6	1	1
3YRQ-FEM3	A62	2	0	.	1	4	3	6	1	.
3YRQ-FEM3	A62	2	1	4	1	4	3	6	1	1
3YRQ-FEM3	B11	3	0	1	0	2	3	6	1	0
3YRQ-FEM3	B11	3	1	1	0	2	3	6	1	0
3YRQ-FEM3	B21	3	0	3	0	2	3	6	1	1
3YRQ-FEM3	B21	3	1	2	1	2	3	6	1	0
3YRQ-FEM3	B31	3	0	3	0	3	3	6	1	1
3YRQ-FEM3	B31	3	1	3	1	3	3	6	1	1
3YRQ-FEM3	B41	3	0	4	1	3	3	6	1	1
3YRQ-FEM3	B41	3	1	4	1	3	3	6	1	1
3YRQ-FEM3	B51	3	0	2	0	4	3	6	1	0
3YRQ-FEM3	B51	3	1	2	0	4	3	6	1	0
3YRQ-FEM3	B61	3	0	3	1	4	3	6	1	1
3YRQ-FEM3	B61	3	1	3	1	4	3	6	1	1
3YRQ-FEM3	C11	1	0	3	1	2	3	6	1	1
3YRQ-FEM3	C11	1	1	3	1	2	3	6	1	1
3YRQ-FEM3	C21	1	0	4	1	2	3	6	1	1
3YRQ-FEM3	C21	1	1	3	1	2	3	6	1	1
3YRQ-FEM3	C31	1	0	2	0	3	3	6	1	0
3YRQ-FEM3	C31	1	1	3	0	3	3	6	1	1
3YRQ-FEM3	C42	1	0	1	0	3	3	6	1	0
3YRQ-FEM3	C42	1	1	2	0	3	3	6	1	0
3YRQ-FEM3	C51	1	0	4	1	4	3	6	1	1
3YRQ-FEM3	C51	1	1	3	1	4	3	6	1	1
AYCR-C5HV	A11	2	0	2	.	2	3	6	1	0
AYCR-C5HV	A11	2	1	4	1	2	3	6	1	1
AYCR-C5HV	A21	2	0	4	1	2	3	6	1	1
AYCR-C5HV	A21	2	1	4	.	2	3	6	1	1
AYCR-C5HV	A31	2	0	3	1	3	3	6	1	1
AYCR-C5HV	A31	2	1	3	1	3	3	6	1	1
AYCR-C5HV	A41	2	0	4	1	3	3	6	1	1
AYCR-C5HV	A41	2	1	3	1	3	3	6	1	1
AYCR-C5HV	A51	2	0	2	.	4	3	6	1	0
AYCR-C5HV	A51	2	1	3	1	4	3	6	1	1
AYCR-C5HV	B12	3	0	2	1	2	3	6	1	0
AYCR-C5HV	B12	3	1	2	0	2	3	6	1	0
AYCR-C5HV	B32	3	0	4	1	3	3	6	1	1
AYCR-C5HV	B32	3	1	4	1	3	3	6	1	1
AYCR-C5HV	B41	3	0	3	1	3	3	6	1	1
AYCR-C5HV	B41	3	1	4	1	3	3	6	1	1
AYCR-C5HV	B51	3	0	4	1	4	3	6	1	1
AYCR-C5HV	B51	3	1	3	1	4	3	6	1	1
AYCR-C5HV	B61	3	0	4	1	4	3	6	1	1
AYCR-C5HV	B61	3	1	4	1	4	3	6	1	1
AYCR-C5HV	C11	1	0	2	0	2	3	6	1	0
AYCR-C5HV	C11	1	1	3	1	2	3	6	1	1
AYCR-C5HV	C21	1	0	4	1	2	3	6	1	1
AYCR-C5HV	C21	1	1	4	1	2	3	6	1	1
AYCR-C5HV	C31	1	0	3	1	3	3	6	1	1
AYCR-C5HV	C31	1	1	2	0	3	3	6	1	0
AYCR-C5HV	C42	1	0	4	1	3	3	6	1	1
AYCR-C5HV	C42	1	1	3	1	3	3	6	1	1
AYCR-C5HV	C51	1	0	2	0	4	3	6	1	0
AYCR-C5HV	C51	1	1	2	0	4	3	6	1	0
AYCR-C5HV	C62	1	0	3	1	4	3	6	1	1
AYCR-C5HV	C62	1	1	3	1	4	3	6	1	1
DBH7-8DG9	A11	1	0	3	1	2	1	6	1	1
DBH7-8DG9	A11	1	1	3	1	2	1	6	1	1
DBH7-8DG9	A21	1	0	4	1	2	1	6	1	1
DBH7-8DG9	A21	1	1	4	1	2	1	6	1	1
DBH7-8DG9	A31	1	0	3	1	3	1	6	1	1
DBH7-8DG9	A31	1	1	3	1	3	1	6	1	1
DBH7-8DG9	A41	1	0	.	1	3	1	6	1	.
DBH7-8DG9	A41	1	1	4	1	3	1	6	1	1
DBH7-8DG9	A51	1	0	3	1	4	1	6	1	1
DBH7-8DG9	A51	1	1	4	1	4	1	6	1	1
DBH7-8DG9	A61	1	0	3	1	4	1	6	1	1
DBH7-8DG9	A61	1	1	2	.	4	1	6	1	0
DBH7-8DG9	B11	2	0	3	1	2	1	6	1	1
DBH7-8DG9	B11	2	1	3	1	2	1	6	1	1
DBH7-8DG9	B21	2	0	2	0	2	1	6	1	0
DBH7-8DG9	B21	2	1	3	1	2	1	6	1	1
DBH7-8DG9	B31	2	0	3	1	3	1	6	1	1
DBH7-8DG9	B31	2	1	3	1	3	1	6	1	1
DBH7-8DG9	B41	2	0	2	0	3	1	6	1	0
DBH7-8DG9	B41	2	1	2	0	3	1	6	1	0
DBH7-8DG9	B51	2	0	2	0	4	1	6	1	0
DBH7-8DG9	B51	2	1	4	1	4	1	6	1	1
DBH7-8DG9	B61	2	0	3	1	4	1	6	1	1
DBH7-8DG9	B61	2	1	4	.	4	1	6	1	1
DBH7-8DG9	C11	3	0	2	0	2	1	6	1	0
DBH7-8DG9	C11	3	1	2	1	2	1	6	1	0
DBH7-8DG9	C21	3	0	2	0	2	1	6	1	0
DBH7-8DG9	C21	3	1	2	1	2	1	6	1	0
DBH7-8DG9	C31	3	0	4	0	3	1	6	1	1
DBH7-8DG9	C31	3	1	2	0	3	1	6	1	0
DBH7-8DG9	C41	3	0	3	1	3	1	6	1	1
DBH7-8DG9	C41	3	1	3	1	3	1	6	1	1
DBH7-8DG9	C51	3	0	3	1	4	1	6	1	1
DBH7-8DG9	C51	3	1	3	1	4	1	6	1	1
DBH7-8DG9	C61	3	0	3	1	4	1	6	1	1
DBH7-8DG9	C61	3	1	3	1	4	1	6	1	1
GR9D-KDDX	A11	2	0	3	1	2	3	3	0	1
GR9D-KDDX	A21	2	0	3	1	2	3	3	0	1
GR9D-KDDX	A31	2	0	2	0	3	3	3	0	0
GR9D-KDDX	A41	2	0	2	0	3	3	3	0	0
GR9D-KDDX	A51	2	0	3	1	4	3	3	0	1
GR9D-KDDX	C11	1	0	3	0	2	3	3	0	1
GR9D-KDDX	C11	1	1	4	1	2	3	3	0	1
GR9D-KDDX	C21	1	0	2	1	2	3	3	0	0
GR9D-KDDX	C21	1	1	4	1	2	3	3	0	1
GR9D-KDDX	C31	1	0	1	0	3	3	3	0	0
GR9D-KDDX	C31	1	1	2	0	3	3	3	0	0
GR9D-KDDX	C42	1	0	2	.	3	3	3	0	0
GR9D-KDDX	C42	1	1	3	1	3	3	3	0	1
GR9D-KDDX	C51	1	0	4	1	4	3	3	0	1
GR9D-KDDX	C51	1	1	4	1	4	3	3	0	1
GR9D-KDDX	C61	1	0	3	1	4	3	3	0	1
GR9D-KDDX	C61	1	1	4	1	4	3	3	0	1
IVYH-FJ6P	A11	1	0	2	0	2	1	6	0	0
IVYH-FJ6P	A11	1	1	3	1	2	1	6	0	1
IVYH-FJ6P	A21	1	0	2	0	2	1	6	0	0
IVYH-FJ6P	A21	1	1	2	1	2	1	6	0	0
IVYH-FJ6P	A31	1	0	2	0	3	1	6	0	0
IVYH-FJ6P	A31	1	1	2	0	3	1	6	0	0
IVYH-FJ6P	A41	1	0	2	0	3	1	6	0	0
IVYH-FJ6P	A41	1	1	3	1	3	1	6	0	1
IVYH-FJ6P	A51	1	0	4	1	4	1	6	0	1
IVYH-FJ6P	A51	1	1	4	1	4	1	6	0	1
IVYH-FJ6P	A61	1	0	4	1	4	1	6	0	1
IVYH-FJ6P	A61	1	1	4	1	4	1	6	0	1
IVYH-FJ6P	B11	2	0	1	0	2	1	6	0	0
IVYH-FJ6P	B11	2	1	2	0	2	1	6	0	0
IVYH-FJ6P	B21	2	0	3	1	2	1	6	0	1
IVYH-FJ6P	B21	2	1	3	1	2	1	6	0	1
IVYH-FJ6P	B31	2	0	2	0	3	1	6	0	0
IVYH-FJ6P	B31	2	1	3	1	3	1	6	0	1
IVYH-FJ6P	B41	2	0	3	1	3	1	6	0	1
IVYH-FJ6P	B41	2	1	.	0	3	1	6	0	.
IVYH-FJ6P	B51	2	0	4	1	4	1	6	0	1
IVYH-FJ6P	B51	2	1	4	1	4	1	6	0	1
IVYH-FJ6P	B61	2	0	4	1	4	1	6	0	1
IVYH-FJ6P	B61	2	1	4	1	4	1	6	0	1
IVYH-FJ6P	C11	3	0	3	1	2	1	6	0	1
IVYH-FJ6P	C11	3	1	4	1	2	1	6	0	1
IVYH-FJ6P	C21	3	0	4	1	2	1	6	0	1
IVYH-FJ6P	C21	3	1	4	1	2	1	6	0	1
IVYH-FJ6P	C31	3	0	4	1	3	1	6	0	1
IVYH-FJ6P	C31	3	1	3	1	3	1	6	0	1
IVYH-FJ6P	C42	3	0	2	0	3	1	6	0	0
IVYH-FJ6P	C42	3	1	1	.	3	1	6	0	0
IVYH-FJ6P	C51	3	0	4	1	4	1	6	0	1
IVYH-FJ6P	C51	3	1	3	1	4	1	6	0	1
IVYH-FJ6P	C61	3	0	3	1	4	1	6	0	1
IVYH-FJ6P	C61	3	1	2	0	4	1	6	0	0
KLT1-VN9I	A11	1	0	4	1	2	1	2	0	1
KLT1-VN9I	A11	1	1	4	1	2	1	2	0	1
KLT1-VN9I	A21	1	0	3	1	2	1	2	0	1
KLT1-VN9I	A21	1	1	3	1	2	1	2	0	1
KLT1-VN9I	A31	1	0	2	0	3	1	2	0	0
KLT1-VN9I	A31	1	1	3	1	3	1	2	0	1
KLT1-VN9I	A41	1	0	3	1	3	1	2	0	1
KLT1-VN9I	A41	1	1	2	0	3	1	2	0	0
KLT1-VN9I	A51	1	0	4	1	4	1	2	0	1
KLT1-VN9I	A51	1	1	2	0	4	1	2	0	0
KLT1-VN9I	A61	1	0	4	1	4	1	2	0	1
KLT1-VN9I	A61	1	1	3	1	4	1	2	0	1
LMI-AAKHCZHOGU	A11	3	0	2	0	2	2	5	0	0
LMI-AAKHCZHOGU	A11	3	1	3	1	2	2	5	0	1
LMI-AAKHCZHOGU	A21	3	0	2	.	2	2	5	0	0
LMI-AAKHCZHOGU	A21	3	1	2	0	2	2	5	0	0
LMI-AAKHCZHOGU	A31	3	0	2	0	3	2	5	0	0
LMI-AAKHCZHOGU	A31	3	1	2	0	3	2	5	0	0
LMI-AAKHCZHOGU	A41	3	0	2	0	3	2	5	0	0
LMI-AAKHCZHOGU	A41	3	1	2	1	3	2	5	0	0
LMI-AAKHCZHOGU	A51	3	0	3	1	4	2	5	0	1
LMI-AAKHCZHOGU	A51	3	1	4	1	4	2	5	0	1
LMI-AAKHCZHOGU	A61	3	0	4	1	4	2	5	0	1
LMI-AAKHCZHOGU	A61	3	1	4	1	4	2	5	0	1
LMI-AAKHCZHOGU	B21	1	0	2	.	2	2	5	0	0
LMI-AAKHCZHOGU	B31	1	0	3	1	3	2	5	0	1
LMI-AAKHCZHOGU	B41	1	0	1	0	3	2	5	0	0
LMI-AAKHCZHOGU	B51	1	0	1	1	4	2	5	0	0
LMI-AAKHCZHOGU	B61	1	0	1	1	4	2	5	0	0
LMI-AAKHCZHOGU	C11	2	0	3	1	2	2	5	0	1
LMI-AAKHCZHOGU	C11	2	1	4	1	2	2	5	0	1
LMI-AAKHCZHOGU	C21	2	0	4	1	2	2	5	0	1
LMI-AAKHCZHOGU	C21	2	1	4	1	2	2	5	0	1
LMI-AAKHCZHOGU	C31	2	0	.	0	3	2	5	0	.
LMI-AAKHCZHOGU	C31	2	1	2	1	3	2	5	0	0
LMI-AAKHCZHOGU	C42	2	0	4	1	3	2	5	0	1
LMI-AAKHCZHOGU	C42	2	1	4	1	3	2	5	0	1
LMI-AAKHCZHOGU	C51	2	0	4	1	4	2	5	0	1
LMI-AAKHCZHOGU	C51	2	1	4	1	4	2	5	0	1
LMI-AAKHCZHOGU	C62	2	0	2	1	4	2	5	0	0
LMI-AAKHCZHOGU	C62	2	1	4	1	4	2	5	0	1
LMI-ANRYCCXQGS	A11	2	0	2	0	2	3	6	1	0
LMI-ANRYCCXQGS	A11	2	1	1	0	2	3	6	1	0
LMI-ANRYCCXQGS	A21	2	0	4	1	2	3	6	1	1
LMI-ANRYCCXQGS	A21	2	1	4	1	2	3	6	1	1
LMI-ANRYCCXQGS	A31	2	0	1	.	3	3	6	1	0
LMI-ANRYCCXQGS	A31	2	1	1	0	3	3	6	1	0
LMI-ANRYCCXQGS	A41	2	0	3	.	3	3	6	1	1
LMI-ANRYCCXQGS	A41	2	1	3	1	3	3	6	1	1
LMI-ANRYCCXQGS	A51	2	0	3	1	4	3	6	1	1
LMI-ANRYCCXQGS	A51	2	1	3	1	4	3	6	1	1
LMI-ANRYCCXQGS	A61	2	0	4	.	4	3	6	1	1
LMI-ANRYCCXQGS	A61	2	1	4	1	4	3	6	1	1
LMI-ANRYCCXQGS	B11	3	0	1	0	2	3	6	1	0
LMI-ANRYCCXQGS	B11	3	1	2	0	2	3	6	1	0
LMI-ANRYCCXQGS	B21	3	0	2	0	2	3	6	1	0
LMI-ANRYCCXQGS	B21	3	1	3	1	2	3	6	1	1
LMI-ANRYCCXQGS	B31	3	0	3	1	3	3	6	1	1
LMI-ANRYCCXQGS	B31	3	1	3	1	3	3	6	1	1
LMI-ANRYCCXQGS	B41	3	0	2	0	3	3	6	1	0
LMI-ANRYCCXQGS	B41	3	1	2	0	3	3	6	1	0
LMI-ANRYCCXQGS	B51	3	0	3	1	4	3	6	1	1
LMI-ANRYCCXQGS	B51	3	1	3	1	4	3	6	1	1
LMI-ANRYCCXQGS	B61	3	0	3	1	4	3	6	1	1
LMI-ANRYCCXQGS	B61	3	1	4	1	4	3	6	1	1
LMI-ANRYCCXQGS	C11	1	0	1	0	2	3	6	1	0
LMI-ANRYCCXQGS	C11	1	1	2	0	2	3	6	1	0
LMI-ANRYCCXQGS	C21	1	0	3	1	2	3	6	1	1
LMI-ANRYCCXQGS	C21	1	1	3	1	2	3	6	1	1
LMI-ANRYCCXQGS	C31	1	0	1	0	3	3	6	1	0
LMI-ANRYCCXQGS	C31	1	1	1	0	3	3	6	1	0
LMI-ANRYCCXQGS	C42	1	0	1	0	3	3	6	1	0
LMI-ANRYCCXQGS	C42	1	1	1	0	3	3	6	1	0
LMI-ANRYCCXQGS	C51	1	0	4	1	4	3	6	1	1
LMI-ANRYCCXQGS	C51	1	1	4	1	4	3	6	1	1
LMI-ANRYCCXQGS	C61	1	0	3	1	4	3	6	1	1
LMI-ANRYCCXQGS	C61	1	1	3	1	4	3	6	1	1
LMI-APPWQFZXEW	A11	2	0	1	0	2	3	2	1	0
LMI-APPWQFZXEW	A21	2	0	3	1	2	3	2	1	1
LMI-APPWQFZXEW	A31	2	0	3	1	3	3	2	1	1
LMI-APPWQFZXEW	A41	2	0	3	.	3	3	2	1	1
LMI-APPWQFZXEW	A51	2	0	4	1	4	3	2	1	1
LMI-APPWQFZXEW	C11	1	0	2	0	2	3	2	1	0
LMI-APPWQFZXEW	C31	1	0	1	.	3	3	2	1	0
LMI-APPWQFZXEW	C41	1	0	2	.	3	3	2	1	0
LMI-APPWQFZXEW	C51	1	0	3	1	4	3	2	1	1
LMI-APPWQFZXEW	C61	1	0	3	1	4	3	2	1	1
LMI-ARXIXBMJOI	A11	3	0	3	1	2	2	6	0	1
LMI-ARXIXBMJOI	A11	3	1	3	1	2	2	6	0	1
LMI-ARXIXBMJOI	A21	3	0	1	0	2	2	6	0	0
LMI-ARXIXBMJOI	A21	3	1	1	0	2	2	6	0	0
LMI-ARXIXBMJOI	A31	3	0	2	.	3	2	6	0	0
LMI-ARXIXBMJOI	A31	3	1	3	0	3	2	6	0	1
LMI-ARXIXBMJOI	A41	3	0	3	.	3	2	6	0	1
LMI-ARXIXBMJOI	A41	3	1	3	1	3	2	6	0	1
LMI-ARXIXBMJOI	A51	3	0	3	1	4	2	6	0	1
LMI-ARXIXBMJOI	A51	3	1	3	1	4	2	6	0	1
LMI-ARXIXBMJOI	A61	3	0	3	1	4	2	6	0	1
LMI-ARXIXBMJOI	A61	3	1	3	1	4	2	6	0	1
LMI-ARXIXBMJOI	B11	1	0	2	0	2	2	6	0	0
LMI-ARXIXBMJOI	B11	1	1	3	1	2	2	6	0	1
LMI-ARXIXBMJOI	B21	1	0	2	0	2	2	6	0	0
LMI-ARXIXBMJOI	B21	1	1	3	1	2	2	6	0	1
LMI-ARXIXBMJOI	B31	1	0	3	1	3	2	6	0	1
LMI-ARXIXBMJOI	B31	1	1	3	1	3	2	6	0	1
LMI-ARXIXBMJOI	B41	1	0	3	1	3	2	6	0	1
LMI-ARXIXBMJOI	B41	1	1	3	1	3	2	6	0	1
LMI-ARXIXBMJOI	B51	1	0	3	1	4	2	6	0	1
LMI-ARXIXBMJOI	B51	1	1	3	1	4	2	6	0	1
LMI-ARXIXBMJOI	B61	1	0	4	1	4	2	6	0	1
LMI-ARXIXBMJOI	B61	1	1	3	1	4	2	6	0	1
LMI-ARXIXBMJOI	C11	2	0	2	1	2	2	6	0	0
LMI-ARXIXBMJOI	C11	2	1	2	0	2	2	6	0	0
LMI-ARXIXBMJOI	C21	2	0	3	1	2	2	6	0	1
LMI-ARXIXBMJOI	C21	2	1	3	0	2	2	6	0	1
LMI-ARXIXBMJOI	C31	2	0	3	1	3	2	6	0	1
LMI-ARXIXBMJOI	C31	2	1	3	1	3	2	6	0	1
LMI-ARXIXBMJOI	C41	2	0	2	.	3	2	6	0	0
LMI-ARXIXBMJOI	C41	2	1	3	1	3	2	6	0	1
LMI-ARXIXBMJOI	C51	2	0	3	1	4	2	6	0	1
LMI-ARXIXBMJOI	C51	2	1	3	1	4	2	6	0	1
LMI-ARXIXBMJOI	C61	2	0	2	.	4	2	6	0	0
LMI-ARXIXBMJOI	C61	2	1	2	0	4	2	6	0	0
LMI-BBKLWBTFPO	A11	3	0	4	1	2	2	6	1	1
LMI-BBKLWBTFPO	A11	3	1	4	1	2	2	6	1	1
LMI-BBKLWBTFPO	A21	3	0	4	1	2	2	6	1	1
LMI-BBKLWBTFPO	A21	3	1	3	1	2	2	6	1	1
LMI-BBKLWBTFPO	A31	3	0	4	1	3	2	6	1	1
LMI-BBKLWBTFPO	A31	3	1	3	1	3	2	6	1	1
LMI-BBKLWBTFPO	A41	3	0	4	1	3	2	6	1	1
LMI-BBKLWBTFPO	A41	3	1	3	1	3	2	6	1	1
LMI-BBKLWBTFPO	A51	3	0	4	1	4	2	6	1	1
LMI-BBKLWBTFPO	A51	3	1	3	1	4	2	6	1	1
LMI-BBKLWBTFPO	A61	3	0	4	1	4	2	6	1	1
LMI-BBKLWBTFPO	A61	3	1	.	1	4	2	6	1	.
LMI-BBKLWBTFPO	B11	1	0	4	1	2	2	6	1	1
LMI-BBKLWBTFPO	B11	1	1	4	1	2	2	6	1	1
LMI-BBKLWBTFPO	B21	1	0	2	0	2	2	6	1	0
LMI-BBKLWBTFPO	B21	1	1	4	1	2	2	6	1	1
LMI-BBKLWBTFPO	B31	1	0	3	1	3	2	6	1	1
LMI-BBKLWBTFPO	B31	1	1	4	1	3	2	6	1	1
LMI-BBKLWBTFPO	B41	1	0	2	1	3	2	6	1	0
LMI-BBKLWBTFPO	B41	1	1	4	.	3	2	6	1	1
LMI-BBKLWBTFPO	B51	1	0	4	1	4	2	6	1	1
LMI-BBKLWBTFPO	B51	1	1	4	1	4	2	6	1	1
LMI-BBKLWBTFPO	B61	1	0	4	1	4	2	6	1	1
LMI-BBKLWBTFPO	B61	1	1	4	1	4	2	6	1	1
LMI-BBKLWBTFPO	C11	2	0	4	1	2	2	6	1	1
LMI-BBKLWBTFPO	C11	2	1	4	1	2	2	6	1	1
LMI-BBKLWBTFPO	C21	2	0	4	1	2	2	6	1	1
LMI-BBKLWBTFPO	C21	2	1	4	1	2	2	6	1	1
LMI-BBKLWBTFPO	C31	2	0	4	1	3	2	6	1	1
LMI-BBKLWBTFPO	C31	2	1	4	1	3	2	6	1	1
LMI-BBKLWBTFPO	C41	2	0	4	1	3	2	6	1	1
LMI-BBKLWBTFPO	C41	2	1	4	1	3	2	6	1	1
LMI-BBKLWBTFPO	C51	2	0	4	1	4	2	6	1	1
LMI-BBKLWBTFPO	C51	2	1	4	1	4	2	6	1	1
LMI-BBKLWBTFPO	C61	2	0	4	1	4	2	6	1	1
LMI-BBKLWBTFPO	C61	2	1	4	1	4	2	6	1	1
LMI-BCWQRUCYSA	A11	2	0	3	0	2	3	6	0	1
LMI-BCWQRUCYSA	A11	2	1	3	1	2	3	6	0	1
LMI-BCWQRUCYSA	A21	2	0	3	0	2	3	6	0	1
LMI-BCWQRUCYSA	A21	2	1	3	1	2	3	6	0	1
LMI-BCWQRUCYSA	A31	2	0	4	.	3	3	6	0	1
LMI-BCWQRUCYSA	A31	2	1	4	1	3	3	6	0	1
LMI-BCWQRUCYSA	A41	2	0	4	1	3	3	6	0	1
LMI-BCWQRUCYSA	A41	2	1	2	1	3	3	6	0	0
LMI-BCWQRUCYSA	A51	2	0	3	1	4	3	6	0	1
LMI-BCWQRUCYSA	A51	2	1	1	1	4	3	6	0	0
LMI-BCWQRUCYSA	A61	2	0	4	0	4	3	6	0	1
LMI-BCWQRUCYSA	A61	2	1	3	1	4	3	6	0	1
LMI-BCWQRUCYSA	B12	3	0	4	1	2	3	6	0	1
LMI-BCWQRUCYSA	B12	3	1	4	1	2	3	6	0	1
LMI-BCWQRUCYSA	B21	3	0	3	1	2	3	6	0	1
LMI-BCWQRUCYSA	B21	3	1	2	1	2	3	6	0	0
LMI-BCWQRUCYSA	B31	3	0	3	0	3	3	6	0	1
LMI-BCWQRUCYSA	B31	3	1	1	1	3	3	6	0	0
LMI-BCWQRUCYSA	B41	3	0	3	0	3	3	6	0	1
LMI-BCWQRUCYSA	B41	3	1	4	1	3	3	6	0	1
LMI-BCWQRUCYSA	B51	3	0	3	1	4	3	6	0	1
LMI-BCWQRUCYSA	B51	3	1	4	1	4	3	6	0	1
LMI-BCWQRUCYSA	B62	3	0	4	.	4	3	6	0	1
LMI-BCWQRUCYSA	B62	3	1	3	1	4	3	6	0	1
LMI-BCWQRUCYSA	C11	1	0	4	.	2	3	6	0	1
LMI-BCWQRUCYSA	C11	1	1	4	1	2	3	6	0	1
LMI-BCWQRUCYSA	C21	1	0	4	0	2	3	6	0	1
LMI-BCWQRUCYSA	C21	1	1	1	1	2	3	6	0	0
LMI-BCWQRUCYSA	C31	1	0	4	0	3	3	6	0	1
LMI-BCWQRUCYSA	C31	1	1	1	1	3	3	6	0	0
LMI-BCWQRUCYSA	C41	1	0	4	0	3	3	6	0	1
LMI-BCWQRUCYSA	C41	1	1	1	1	3	3	6	0	0
LMI-BCWQRUCYSA	C51	1	0	4	0	4	3	6	0	1
LMI-BCWQRUCYSA	C51	1	1	3	1	4	3	6	0	1
LMI-BCWQRUCYSA	C61	1	0	4	0	4	3	6	0	1
LMI-BCWQRUCYSA	C61	1	1	3	1	4	3	6	0	1
LMI-BKKFBBOSDL	A12	1	0	4	0	2	1	6	0	1
LMI-BKKFBBOSDL	A12	1	1	3	1	2	1	6	0	1
LMI-BKKFBBOSDL	A21	1	0	4	1	2	1	6	0	1
LMI-BKKFBBOSDL	A21	1	1	3	1	2	1	6	0	1
LMI-BKKFBBOSDL	A31	1	0	4	1	3	1	6	0	1
LMI-BKKFBBOSDL	A31	1	1	4	1	3	1	6	0	1
LMI-BKKFBBOSDL	A41	1	0	2	.	3	1	6	0	0
LMI-BKKFBBOSDL	A41	1	1	1	1	3	1	6	0	0
LMI-BKKFBBOSDL	A52	1	0	2	0	4	1	6	0	0
LMI-BKKFBBOSDL	A52	1	1	2	1	4	1	6	0	0
LMI-BKKFBBOSDL	A61	1	0	2	.	4	1	6	0	0
LMI-BKKFBBOSDL	A61	1	1	1	1	4	1	6	0	0
LMI-BKKFBBOSDL	B11	2	0	1	0	2	1	6	0	0
LMI-BKKFBBOSDL	B11	2	1	1	0	2	1	6	0	0
LMI-BKKFBBOSDL	B21	2	0	3	1	2	1	6	0	1
LMI-BKKFBBOSDL	B21	2	1	3	1	2	1	6	0	1
LMI-BKKFBBOSDL	B31	2	0	1	0	3	1	6	0	0
LMI-BKKFBBOSDL	B31	2	1	1	0	3	1	6	0	0
LMI-BKKFBBOSDL	B41	2	0	2	0	3	1	6	0	0
LMI-BKKFBBOSDL	B41	2	1	2	0	3	1	6	0	0
LMI-BKKFBBOSDL	B51	2	0	3	.	4	1	6	0	1
LMI-BKKFBBOSDL	B51	2	1	2	0	4	1	6	0	0
LMI-BKKFBBOSDL	B61	2	0	3	1	4	1	6	0	1
LMI-BKKFBBOSDL	B61	2	1	4	1	4	1	6	0	1
LMI-BKKFBBOSDL	C11	3	0	2	0	2	1	6	0	0
LMI-BKKFBBOSDL	C11	3	1	3	0	2	1	6	0	1
LMI-BKKFBBOSDL	C21	3	0	4	1	2	1	6	0	1
LMI-BKKFBBOSDL	C21	3	1	4	1	2	1	6	0	1
LMI-BKKFBBOSDL	C31	3	0	2	0	3	1	6	0	0
LMI-BKKFBBOSDL	C31	3	1	1	0	3	1	6	0	0
LMI-BKKFBBOSDL	C42	3	0	4	1	3	1	6	0	1
LMI-BKKFBBOSDL	C42	3	1	4	1	3	1	6	0	1
LMI-BKKFBBOSDL	C52	3	0	4	1	4	1	6	0	1
LMI-BKKFBBOSDL	C52	3	1	4	1	4	1	6	0	1
LMI-BKKFBBOSDL	C62	3	0	2	0	4	1	6	0	0
LMI-BKKFBBOSDL	C62	3	1	1	0	4	1	6	0	0
LMI-BMZARXCLFX	A11	1	0	2	0	2	1	6	1	0
LMI-BMZARXCLFX	A11	1	1	2	0	2	1	6	1	0
LMI-BMZARXCLFX	A21	1	0	2	0	2	1	6	1	0
LMI-BMZARXCLFX	A21	1	1	2	0	2	1	6	1	0
LMI-BMZARXCLFX	A31	1	0	2	0	3	1	6	1	0
LMI-BMZARXCLFX	A31	1	1	1	0	3	1	6	1	0
LMI-BMZARXCLFX	A41	1	0	4	1	3	1	6	1	1
LMI-BMZARXCLFX	A41	1	1	4	1	3	1	6	1	1
LMI-BMZARXCLFX	A51	1	0	4	1	4	1	6	1	1
LMI-BMZARXCLFX	A51	1	1	4	1	4	1	6	1	1
LMI-BMZARXCLFX	A61	1	0	4	1	4	1	6	1	1
LMI-BMZARXCLFX	A61	1	1	4	1	4	1	6	1	1
LMI-BMZARXCLFX	B11	2	0	4	1	2	1	6	1	1
LMI-BMZARXCLFX	B11	2	1	4	1	2	1	6	1	1
LMI-BMZARXCLFX	B21	2	0	2	0	2	1	6	1	0
LMI-BMZARXCLFX	B21	2	1	1	0	2	1	6	1	0
LMI-BMZARXCLFX	B31	2	0	4	1	3	1	6	1	1
LMI-BMZARXCLFX	B31	2	1	4	1	3	1	6	1	1
LMI-BMZARXCLFX	B41	2	0	4	1	3	1	6	1	1
LMI-BMZARXCLFX	B41	2	1	4	1	3	1	6	1	1
LMI-BMZARXCLFX	B51	2	0	4	1	4	1	6	1	1
LMI-BMZARXCLFX	B51	2	1	4	1	4	1	6	1	1
LMI-BMZARXCLFX	B61	2	0	4	1	4	1	6	1	1
LMI-BMZARXCLFX	B61	2	1	4	1	4	1	6	1	1
LMI-BMZARXCLFX	C21	3	0	4	0	2	1	6	1	1
LMI-BMZARXCLFX	C21	3	1	1	0	2	1	6	1	0
LMI-BMZARXCLFX	C31	3	0	4	0	3	1	6	1	1
LMI-BMZARXCLFX	C31	3	1	1	0	3	1	6	1	0
LMI-BMZARXCLFX	C42	3	0	4	0	3	1	6	1	1
LMI-BMZARXCLFX	C42	3	1	1	0	3	1	6	1	0
LMI-BMZARXCLFX	C51	3	0	4	1	4	1	6	1	1
LMI-BMZARXCLFX	C51	3	1	4	1	4	1	6	1	1
LMI-BMZARXCLFX	C61	3	0	4	1	4	1	6	1	1
LMI-BMZARXCLFX	C61	3	1	4	1	4	1	6	1	1
LMI-BOKGSCORKF	A11	1	0	4	0	2	1	6	1	1
LMI-BOKGSCORKF	A11	1	1	4	1	2	1	6	1	1
LMI-BOKGSCORKF	A21	1	0	2	0	2	1	6	1	0
LMI-BOKGSCORKF	A21	1	1	2	0	2	1	6	1	0
LMI-BOKGSCORKF	A31	1	0	4	1	3	1	6	1	1
LMI-BOKGSCORKF	A31	1	1	4	1	3	1	6	1	1
LMI-BOKGSCORKF	A41	1	0	4	1	3	1	6	1	1
LMI-BOKGSCORKF	A41	1	1	4	1	3	1	6	1	1
LMI-BOKGSCORKF	A52	1	0	4	1	4	1	6	1	1
LMI-BOKGSCORKF	A52	1	1	4	1	4	1	6	1	1
LMI-BOKGSCORKF	A62	1	0	4	1	4	1	6	1	1
LMI-BOKGSCORKF	A62	1	1	4	1	4	1	6	1	1
LMI-BOKGSCORKF	B11	2	0	4	1	2	1	6	1	1
LMI-BOKGSCORKF	B11	2	1	4	1	2	1	6	1	1
LMI-BOKGSCORKF	B21	2	0	4	1	2	1	6	1	1
LMI-BOKGSCORKF	B21	2	1	4	1	2	1	6	1	1
LMI-BOKGSCORKF	B31	2	0	4	1	3	1	6	1	1
LMI-BOKGSCORKF	B31	2	1	4	1	3	1	6	1	1
LMI-BOKGSCORKF	B41	2	0	4	1	3	1	6	1	1
LMI-BOKGSCORKF	B41	2	1	4	1	3	1	6	1	1
LMI-BOKGSCORKF	B51	2	0	4	1	4	1	6	1	1
LMI-BOKGSCORKF	B51	2	1	4	1	4	1	6	1	1
LMI-BOKGSCORKF	B61	2	0	4	1	4	1	6	1	1
LMI-BOKGSCORKF	B61	2	1	4	1	4	1	6	1	1
LMI-BOKGSCORKF	C11	3	0	4	1	2	1	6	1	1
LMI-BOKGSCORKF	C11	3	1	4	1	2	1	6	1	1
LMI-BOKGSCORKF	C21	3	0	4	1	2	1	6	1	1
LMI-BOKGSCORKF	C21	3	1	4	1	2	1	6	1	1
LMI-BOKGSCORKF	C31	3	0	4	1	3	1	6	1	1
LMI-BOKGSCORKF	C31	3	1	4	1	3	1	6	1	1
LMI-BOKGSCORKF	C42	3	0	4	1	3	1	6	1	1
LMI-BOKGSCORKF	C42	3	1	4	1	3	1	6	1	1
LMI-BOKGSCORKF	C51	3	0	4	1	4	1	6	1	1
LMI-BOKGSCORKF	C51	3	1	4	1	4	1	6	1	1
LMI-BOKGSCORKF	C61	3	0	4	1	4	1	6	1	1
LMI-BOKGSCORKF	C61	3	1	4	1	4	1	6	1	1
LMI-CYBZIFZMTE	A11	1	0	3	0	2	1	6	0	1
LMI-CYBZIFZMTE	A11	1	1	2	1	2	1	6	0	0
LMI-CYBZIFZMTE	A21	1	0	4	1	2	1	6	0	1
LMI-CYBZIFZMTE	A21	1	1	3	1	2	1	6	0	1
LMI-CYBZIFZMTE	A31	1	0	3	1	3	1	6	0	1
LMI-CYBZIFZMTE	A31	1	1	3	1	3	1	6	0	1
LMI-CYBZIFZMTE	A41	1	0	3	1	3	1	6	0	1
LMI-CYBZIFZMTE	A41	1	1	3	1	3	1	6	0	1
LMI-CYBZIFZMTE	A51	1	0	2	.	4	1	6	0	0
LMI-CYBZIFZMTE	A51	1	1	2	1	4	1	6	0	0
LMI-CYBZIFZMTE	A61	1	0	3	1	4	1	6	0	1
LMI-CYBZIFZMTE	A61	1	1	3	1	4	1	6	0	1
LMI-CYBZIFZMTE	B11	2	0	3	0	2	1	6	0	1
LMI-CYBZIFZMTE	B11	2	1	2	1	2	1	6	0	0
LMI-CYBZIFZMTE	B21	2	0	3	.	2	1	6	0	1
LMI-CYBZIFZMTE	B21	2	1	3	1	2	1	6	0	1
LMI-CYBZIFZMTE	B31	2	0	3	.	3	1	6	0	1
LMI-CYBZIFZMTE	B31	2	1	3	1	3	1	6	0	1
LMI-CYBZIFZMTE	B41	2	0	3	0	3	1	6	0	1
LMI-CYBZIFZMTE	B41	2	1	2	1	3	1	6	0	0
LMI-CYBZIFZMTE	B51	2	0	3	.	4	1	6	0	1
LMI-CYBZIFZMTE	B51	2	1	3	1	4	1	6	0	1
LMI-CYBZIFZMTE	B61	2	0	4	1	4	1	6	0	1
LMI-CYBZIFZMTE	B61	2	1	4	1	4	1	6	0	1
LMI-CYBZIFZMTE	C11	3	0	3	1	2	1	6	0	1
LMI-CYBZIFZMTE	C11	3	1	3	1	2	1	6	0	1
LMI-CYBZIFZMTE	C21	3	0	3	.	2	1	6	0	1
LMI-CYBZIFZMTE	C21	3	1	3	1	2	1	6	0	1
LMI-CYBZIFZMTE	C31	3	0	3	.	3	1	6	0	1
LMI-CYBZIFZMTE	C31	3	1	3	1	3	1	6	0	1
LMI-CYBZIFZMTE	C42	3	0	3	1	3	1	6	0	1
LMI-CYBZIFZMTE	C42	3	1	3	1	3	1	6	0	1
LMI-CYBZIFZMTE	C52	3	0	3	1	4	1	6	0	1
LMI-CYBZIFZMTE	C52	3	1	3	1	4	1	6	0	1
LMI-CYBZIFZMTE	C61	3	0	3	1	4	1	6	0	1
LMI-CYBZIFZMTE	C61	3	1	3	1	4	1	6	0	1
LMI-DCZZAPSVVJ	A11	3	0	4	1	2	2	6	1	1
LMI-DCZZAPSVVJ	A11	3	1	4	1	2	2	6	1	1
LMI-DCZZAPSVVJ	A21	3	0	3	1	2	2	6	1	1
LMI-DCZZAPSVVJ	A21	3	1	3	0	2	2	6	1	1
LMI-DCZZAPSVVJ	A31	3	0	2	.	3	2	6	1	0
LMI-DCZZAPSVVJ	A31	3	1	1	0	3	2	6	1	0
LMI-DCZZAPSVVJ	A41	3	0	4	1	3	2	6	1	1
LMI-DCZZAPSVVJ	A41	3	1	2	1	3	2	6	1	0
LMI-DCZZAPSVVJ	A51	3	0	4	1	4	2	6	1	1
LMI-DCZZAPSVVJ	A51	3	1	4	1	4	2	6	1	1
LMI-DCZZAPSVVJ	A61	3	0	4	1	4	2	6	1	1
LMI-DCZZAPSVVJ	A61	3	1	4	1	4	2	6	1	1
LMI-DCZZAPSVVJ	B11	1	0	4	1	2	2	6	1	1
LMI-DCZZAPSVVJ	B11	1	1	4	1	2	2	6	1	1
LMI-DCZZAPSVVJ	B21	1	0	2	0	2	2	6	1	0
LMI-DCZZAPSVVJ	B21	1	1	1	0	2	2	6	1	0
LMI-DCZZAPSVVJ	B31	1	0	3	1	3	2	6	1	1
LMI-DCZZAPSVVJ	B31	1	1	3	1	3	2	6	1	1
LMI-DCZZAPSVVJ	B41	1	0	1	1	3	2	6	1	0
LMI-DCZZAPSVVJ	B41	1	1	2	0	3	2	6	1	0
LMI-DCZZAPSVVJ	B51	1	0	3	1	4	2	6	1	1
LMI-DCZZAPSVVJ	B51	1	1	3	0	4	2	6	1	1
LMI-DCZZAPSVVJ	B61	1	0	4	1	4	2	6	1	1
LMI-DCZZAPSVVJ	B61	1	1	4	1	4	2	6	1	1
LMI-DCZZAPSVVJ	C11	2	0	4	1	2	2	6	1	1
LMI-DCZZAPSVVJ	C11	2	1	2	0	2	2	6	1	0
LMI-DCZZAPSVVJ	C21	2	0	4	1	2	2	6	1	1
LMI-DCZZAPSVVJ	C21	2	1	4	1	2	2	6	1	1
LMI-DCZZAPSVVJ	C31	2	0	2	1	3	2	6	1	0
LMI-DCZZAPSVVJ	C31	2	1	1	0	3	2	6	1	0
LMI-DCZZAPSVVJ	C42	2	0	3	1	3	2	6	1	1
LMI-DCZZAPSVVJ	C42	2	1	1	0	3	2	6	1	0
LMI-DCZZAPSVVJ	C51	2	0	4	1	4	2	6	1	1
LMI-DCZZAPSVVJ	C51	2	1	4	1	4	2	6	1	1
LMI-DCZZAPSVVJ	C61	2	0	4	1	4	2	6	1	1
LMI-DCZZAPSVVJ	C61	2	1	4	1	4	2	6	1	1
LMI-DOFPYFINIC	A11	2	0	3	1	2	3	5	1	1
LMI-DOFPYFINIC	A11	2	1	2	1	2	3	5	1	0
LMI-DOFPYFINIC	A21	2	0	4	1	2	3	5	1	1
LMI-DOFPYFINIC	A21	2	1	4	.	2	3	5	1	1
LMI-DOFPYFINIC	A31	2	0	1	0	3	3	5	1	0
LMI-DOFPYFINIC	A31	2	1	1	0	3	3	5	1	0
LMI-DOFPYFINIC	A41	2	0	3	1	3	3	5	1	1
LMI-DOFPYFINIC	A41	2	1	3	1	3	3	5	1	1
LMI-DOFPYFINIC	A51	2	0	4	1	4	3	5	1	1
LMI-DOFPYFINIC	A51	2	1	4	1	4	3	5	1	1
LMI-DOFPYFINIC	A61	2	0	4	1	4	3	5	1	1
LMI-DOFPYFINIC	A61	2	1	4	1	4	3	5	1	1
LMI-DOFPYFINIC	B11	3	0	2	0	2	3	5	1	0
LMI-DOFPYFINIC	B11	3	1	1	1	2	3	5	1	0
LMI-DOFPYFINIC	B21	3	0	3	1	2	3	5	1	1
LMI-DOFPYFINIC	B21	3	1	3	1	2	3	5	1	1
LMI-DOFPYFINIC	B31	3	0	3	1	3	3	5	1	1
LMI-DOFPYFINIC	B31	3	1	2	1	3	3	5	1	0
LMI-DOFPYFINIC	B41	3	0	3	1	3	3	5	1	1
LMI-DOFPYFINIC	B41	3	1	4	1	3	3	5	1	1
LMI-DOFPYFINIC	B51	3	0	4	1	4	3	5	1	1
LMI-DOFPYFINIC	B51	3	1	4	1	4	3	5	1	1
LMI-DOFPYFINIC	B61	3	0	4	1	4	3	5	1	1
LMI-DOFPYFINIC	B61	3	1	4	1	4	3	5	1	1
LMI-DOFPYFINIC	C11	1	0	4	1	2	3	5	1	1
LMI-DOFPYFINIC	C21	1	0	3	1	2	3	5	1	1
LMI-DOFPYFINIC	C31	1	0	1	0	3	3	5	1	0
LMI-DOFPYFINIC	C42	1	0	2	0	3	3	5	1	0
LMI-DOFPYFINIC	C51	1	0	4	1	4	3	5	1	1
LMI-DOFPYFINIC	C61	1	0	3	1	4	3	5	1	1
LMI-EFGAUZVVGW	A11	2	0	3	1	2	3	6	0	1
LMI-EFGAUZVVGW	A11	2	1	2	0	2	3	6	0	0
LMI-EFGAUZVVGW	A21	2	0	4	1	2	3	6	0	1
LMI-EFGAUZVVGW	A21	2	1	3	1	2	3	6	0	1
LMI-EFGAUZVVGW	A32	2	0	2	.	3	3	6	0	0
LMI-EFGAUZVVGW	A32	2	1	2	0	3	3	6	0	0
LMI-EFGAUZVVGW	A41	2	0	2	.	3	3	6	0	0
LMI-EFGAUZVVGW	A41	2	1	2	0	3	3	6	0	0
LMI-EFGAUZVVGW	A52	2	0	4	1	4	3	6	0	1
LMI-EFGAUZVVGW	A52	2	1	2	1	4	3	6	0	0
LMI-EFGAUZVVGW	A61	2	0	4	1	4	3	6	0	1
LMI-EFGAUZVVGW	A61	2	1	3	1	4	3	6	0	1
LMI-EFGAUZVVGW	B11	3	0	3	1	2	3	6	0	1
LMI-EFGAUZVVGW	B11	3	1	3	1	2	3	6	0	1
LMI-EFGAUZVVGW	B21	3	0	3	1	2	3	6	0	1
LMI-EFGAUZVVGW	B21	3	1	3	1	2	3	6	0	1
LMI-EFGAUZVVGW	B31	3	0	2	0	3	3	6	0	0
LMI-EFGAUZVVGW	B31	3	1	2	0	3	3	6	0	0
LMI-EFGAUZVVGW	B41	3	0	3	0	3	3	6	0	1
LMI-EFGAUZVVGW	B41	3	1	2	0	3	3	6	0	0
LMI-EFGAUZVVGW	B51	3	0	2	0	4	3	6	0	0
LMI-EFGAUZVVGW	B51	3	1	2	0	4	3	6	0	0
LMI-EFGAUZVVGW	B61	3	0	2	1	4	3	6	0	0
LMI-EFGAUZVVGW	B61	3	1	2	0	4	3	6	0	0
LMI-EFGAUZVVGW	C11	1	0	3	0	2	3	6	0	1
LMI-EFGAUZVVGW	C11	1	1	2	0	2	3	6	0	0
LMI-EFGAUZVVGW	C21	1	0	4	1	2	3	6	0	1
LMI-EFGAUZVVGW	C21	1	1	3	1	2	3	6	0	1
LMI-EFGAUZVVGW	C32	1	0	2	0	3	3	6	0	0
LMI-EFGAUZVVGW	C32	1	1	4	1	3	3	6	0	1
LMI-EFGAUZVVGW	C42	1	0	2	0	3	3	6	0	0
LMI-EFGAUZVVGW	C42	1	1	2	0	3	3	6	0	0
LMI-EFGAUZVVGW	C51	1	0	3	1	4	3	6	0	1
LMI-EFGAUZVVGW	C51	1	1	3	1	4	3	6	0	1
LMI-EFGAUZVVGW	C61	1	0	3	1	4	3	6	0	1
LMI-EFGAUZVVGW	C61	1	1	1	0	4	3	6	0	0
LMI-EINIQVAZWG	A11	3	0	3	1	2	2	6	0	1
LMI-EINIQVAZWG	A11	3	1	4	1	2	2	6	0	1
LMI-EINIQVAZWG	A21	3	0	2	1	2	2	6	0	0
LMI-EINIQVAZWG	A21	3	1	3	1	2	2	6	0	1
LMI-EINIQVAZWG	A31	3	0	2	0	3	2	6	0	0
LMI-EINIQVAZWG	A31	3	1	2	0	3	2	6	0	0
LMI-EINIQVAZWG	A41	3	0	2	1	3	2	6	0	0
LMI-EINIQVAZWG	A41	3	1	4	1	3	2	6	0	1
LMI-EINIQVAZWG	A51	3	0	4	1	4	2	6	0	1
LMI-EINIQVAZWG	A51	3	1	4	.	4	2	6	0	1
LMI-EINIQVAZWG	A61	3	0	4	1	4	2	6	0	1
LMI-EINIQVAZWG	A61	3	1	4	1	4	2	6	0	1
LMI-EINIQVAZWG	B12	1	0	3	1	2	2	6	0	1
LMI-EINIQVAZWG	B12	1	1	4	1	2	2	6	0	1
LMI-EINIQVAZWG	B21	1	0	2	0	2	2	6	0	0
LMI-EINIQVAZWG	B21	1	1	2	0	2	2	6	0	0
LMI-EINIQVAZWG	B31	1	0	2	0	3	2	6	0	0
LMI-EINIQVAZWG	B31	1	1	2	0	3	2	6	0	0
LMI-EINIQVAZWG	B41	1	0	4	1	3	2	6	0	1
LMI-EINIQVAZWG	B41	1	1	4	1	3	2	6	0	1
LMI-EINIQVAZWG	B51	1	0	4	1	4	2	6	0	1
LMI-EINIQVAZWG	B51	1	1	4	1	4	2	6	0	1
LMI-EINIQVAZWG	B61	1	0	4	1	4	2	6	0	1
LMI-EINIQVAZWG	B61	1	1	4	1	4	2	6	0	1
LMI-EINIQVAZWG	C11	2	0	2	0	2	2	6	0	0
LMI-EINIQVAZWG	C11	2	1	4	1	2	2	6	0	1
LMI-EINIQVAZWG	C21	2	0	3	1	2	2	6	0	1
LMI-EINIQVAZWG	C21	2	1	4	1	2	2	6	0	1
LMI-EINIQVAZWG	C31	2	0	2	0	3	2	6	0	0
LMI-EINIQVAZWG	C31	2	1	2	0	3	2	6	0	0
LMI-EINIQVAZWG	C42	2	0	2	0	3	2	6	0	0
LMI-EINIQVAZWG	C42	2	1	4	1	3	2	6	0	1
LMI-EINIQVAZWG	C51	2	0	3	1	4	2	6	0	1
LMI-EINIQVAZWG	C51	2	1	4	1	4	2	6	0	1
LMI-EINIQVAZWG	C61	2	0	4	1	4	2	6	0	1
LMI-EINIQVAZWG	C61	2	1	4	.	4	2	6	0	1
LMI-EKYNYSGALD	A12	3	0	3	1	2	2	6	1	1
LMI-EKYNYSGALD	A12	3	1	3	1	2	2	6	1	1
LMI-EKYNYSGALD	A21	3	0	3	1	2	2	6	1	1
LMI-EKYNYSGALD	A21	3	1	3	1	2	2	6	1	1
LMI-EKYNYSGALD	A31	3	0	2	0	3	2	6	1	0
LMI-EKYNYSGALD	A31	3	1	2	0	3	2	6	1	0
LMI-EKYNYSGALD	A41	3	0	3	.	3	2	6	1	1
LMI-EKYNYSGALD	A41	3	1	3	1	3	2	6	1	1
LMI-EKYNYSGALD	A51	3	0	3	1	4	2	6	1	1
LMI-EKYNYSGALD	A51	3	1	3	1	4	2	6	1	1
LMI-EKYNYSGALD	A61	3	0	3	1	4	2	6	1	1
LMI-EKYNYSGALD	A61	3	1	3	1	4	2	6	1	1
LMI-EKYNYSGALD	B11	1	0	3	1	2	2	6	1	1
LMI-EKYNYSGALD	B11	1	1	2	1	2	2	6	1	0
LMI-EKYNYSGALD	B21	1	0	4	1	2	2	6	1	1
LMI-EKYNYSGALD	B21	1	1	2	1	2	2	6	1	0
LMI-EKYNYSGALD	B31	1	0	3	1	3	2	6	1	1
LMI-EKYNYSGALD	B31	1	1	2	1	3	2	6	1	0
LMI-EKYNYSGALD	B41	1	0	3	.	3	2	6	1	1
LMI-EKYNYSGALD	B41	1	1	4	1	3	2	6	1	1
LMI-EKYNYSGALD	B51	1	0	4	1	4	2	6	1	1
LMI-EKYNYSGALD	B51	1	1	3	1	4	2	6	1	1
LMI-EKYNYSGALD	B61	1	0	4	1	4	2	6	1	1
LMI-EKYNYSGALD	B61	1	1	3	1	4	2	6	1	1
LMI-EKYNYSGALD	C21	2	0	3	1	2	2	6	1	1
LMI-EKYNYSGALD	C21	2	1	3	1	2	2	6	1	1
LMI-EKYNYSGALD	C31	2	0	2	1	3	2	6	1	0
LMI-EKYNYSGALD	C31	2	1	2	0	3	2	6	1	0
LMI-EKYNYSGALD	C41	2	0	3	1	3	2	6	1	1
LMI-EKYNYSGALD	C41	2	1	3	1	3	2	6	1	1
LMI-EKYNYSGALD	C52	2	0	3	1	4	2	6	1	1
LMI-EKYNYSGALD	C52	2	1	3	1	4	2	6	1	1
LMI-EKYNYSGALD	C61	2	0	2	1	4	2	6	1	0
LMI-EKYNYSGALD	C61	2	1	3	1	4	2	6	1	1
LMI-EXTDJXVLNG	A11	2	0	2	.	2	3	6	1	0
LMI-EXTDJXVLNG	A11	2	1	2	0	2	3	6	1	0
LMI-EXTDJXVLNG	A21	2	0	1	0	2	3	6	1	0
LMI-EXTDJXVLNG	A21	2	1	1	0	2	3	6	1	0
LMI-EXTDJXVLNG	A31	2	0	2	1	3	3	6	1	0
LMI-EXTDJXVLNG	A31	2	1	3	0	3	3	6	1	1
LMI-EXTDJXVLNG	A41	2	0	3	1	3	3	6	1	1
LMI-EXTDJXVLNG	A41	2	1	4	1	3	3	6	1	1
LMI-EXTDJXVLNG	A51	2	0	4	.	4	3	6	1	1
LMI-EXTDJXVLNG	A51	2	1	4	1	4	3	6	1	1
LMI-EXTDJXVLNG	A61	2	0	4	.	4	3	6	1	1
LMI-EXTDJXVLNG	A61	2	1	4	1	4	3	6	1	1
LMI-EXTDJXVLNG	B11	3	0	2	0	2	3	6	1	0
LMI-EXTDJXVLNG	B11	3	1	2	0	2	3	6	1	0
LMI-EXTDJXVLNG	B21	3	0	3	1	2	3	6	1	1
LMI-EXTDJXVLNG	B21	3	1	3	0	2	3	6	1	1
LMI-EXTDJXVLNG	B31	3	0	3	0	3	3	6	1	1
LMI-EXTDJXVLNG	B31	3	1	4	1	3	3	6	1	1
LMI-EXTDJXVLNG	B41	3	0	2	0	3	3	6	1	0
LMI-EXTDJXVLNG	B41	3	1	1	0	3	3	6	1	0
LMI-EXTDJXVLNG	B51	3	0	4	1	4	3	6	1	1
LMI-EXTDJXVLNG	B51	3	1	4	1	4	3	6	1	1
LMI-EXTDJXVLNG	B61	3	0	4	1	4	3	6	1	1
LMI-EXTDJXVLNG	B61	3	1	4	1	4	3	6	1	1
LMI-EXTDJXVLNG	C11	1	0	2	0	2	3	6	1	0
LMI-EXTDJXVLNG	C11	1	1	3	1	2	3	6	1	1
LMI-EXTDJXVLNG	C21	1	0	3	1	2	3	6	1	1
LMI-EXTDJXVLNG	C21	1	1	4	1	2	3	6	1	1
LMI-EXTDJXVLNG	C31	1	0	2	.	3	3	6	1	0
LMI-EXTDJXVLNG	C31	1	1	2	0	3	3	6	1	0
LMI-EXTDJXVLNG	C42	1	0	4	1	3	3	6	1	1
LMI-EXTDJXVLNG	C42	1	1	3	0	3	3	6	1	1
LMI-EXTDJXVLNG	C51	1	0	4	1	4	3	6	1	1
LMI-EXTDJXVLNG	C51	1	1	4	1	4	3	6	1	1
LMI-EXTDJXVLNG	C61	1	0	4	1	4	3	6	1	1
LMI-EXTDJXVLNG	C61	1	1	4	1	4	3	6	1	1
LMI-FGLMIVNCAP	A11	1	0	3	1	2	1	6	1	1
LMI-FGLMIVNCAP	A11	1	1	3	1	2	1	6	1	1
LMI-FGLMIVNCAP	A21	1	0	4	1	2	1	6	1	1
LMI-FGLMIVNCAP	A21	1	1	4	1	2	1	6	1	1
LMI-FGLMIVNCAP	A31	1	0	1	0	3	1	6	1	0
LMI-FGLMIVNCAP	A31	1	1	2	0	3	1	6	1	0
LMI-FGLMIVNCAP	A41	1	0	2	0	3	1	6	1	0
LMI-FGLMIVNCAP	A41	1	1	2	1	3	1	6	1	0
LMI-FGLMIVNCAP	A51	1	0	3	1	4	1	6	1	1
LMI-FGLMIVNCAP	A51	1	1	3	1	4	1	6	1	1
LMI-FGLMIVNCAP	A61	1	0	4	1	4	1	6	1	1
LMI-FGLMIVNCAP	A61	1	1	4	1	4	1	6	1	1
LMI-FGLMIVNCAP	B11	2	0	2	0	2	1	6	1	0
LMI-FGLMIVNCAP	B11	2	1	1	0	2	1	6	1	0
LMI-FGLMIVNCAP	B21	2	0	4	1	2	1	6	1	1
LMI-FGLMIVNCAP	B21	2	1	4	1	2	1	6	1	1
LMI-FGLMIVNCAP	B31	2	0	3	1	3	1	6	1	1
LMI-FGLMIVNCAP	B31	2	1	3	1	3	1	6	1	1
LMI-FGLMIVNCAP	B41	2	0	3	1	3	1	6	1	1
LMI-FGLMIVNCAP	B41	2	1	3	1	3	1	6	1	1
LMI-FGLMIVNCAP	B51	2	0	4	1	4	1	6	1	1
LMI-FGLMIVNCAP	B51	2	1	3	1	4	1	6	1	1
LMI-FGLMIVNCAP	B61	2	0	4	1	4	1	6	1	1
LMI-FGLMIVNCAP	B61	2	1	4	1	4	1	6	1	1
LMI-FGLMIVNCAP	C11	3	0	2	.	2	1	6	1	0
LMI-FGLMIVNCAP	C11	3	1	1	0	2	1	6	1	0
LMI-FGLMIVNCAP	C21	3	0	4	1	2	1	6	1	1
LMI-FGLMIVNCAP	C21	3	1	3	1	2	1	6	1	1
LMI-FGLMIVNCAP	C31	3	0	3	1	3	1	6	1	1
LMI-FGLMIVNCAP	C31	3	1	3	1	3	1	6	1	1
LMI-FGLMIVNCAP	C41	3	0	3	1	3	1	6	1	1
LMI-FGLMIVNCAP	C41	3	1	4	1	3	1	6	1	1
LMI-FGLMIVNCAP	C51	3	0	4	1	4	1	6	1	1
LMI-FGLMIVNCAP	C51	3	1	4	1	4	1	6	1	1
LMI-FGLMIVNCAP	C62	3	0	4	1	4	1	6	1	1
LMI-FGLMIVNCAP	C62	3	1	3	1	4	1	6	1	1
LMI-FYLLYSNXXX	A11	3	0	4	1	2	2	6	1	1
LMI-FYLLYSNXXX	A11	3	1	4	1	2	2	6	1	1
LMI-FYLLYSNXXX	A21	3	0	4	.	2	2	6	1	1
LMI-FYLLYSNXXX	A21	3	1	2	0	2	2	6	1	0
LMI-FYLLYSNXXX	A31	3	0	4	1	3	2	6	1	1
LMI-FYLLYSNXXX	A31	3	1	4	1	3	2	6	1	1
LMI-FYLLYSNXXX	A41	3	0	2	0	3	2	6	1	0
LMI-FYLLYSNXXX	A41	3	1	3	1	3	2	6	1	1
LMI-FYLLYSNXXX	A51	3	0	4	1	4	2	6	1	1
LMI-FYLLYSNXXX	A51	3	1	4	1	4	2	6	1	1
LMI-FYLLYSNXXX	A61	3	0	4	1	4	2	6	1	1
LMI-FYLLYSNXXX	A61	3	1	4	1	4	2	6	1	1
LMI-FYLLYSNXXX	B11	1	0	2	0	2	2	6	1	0
LMI-FYLLYSNXXX	B11	1	1	4	1	2	2	6	1	1
LMI-FYLLYSNXXX	B21	1	0	3	1	2	2	6	1	1
LMI-FYLLYSNXXX	B21	1	1	4	1	2	2	6	1	1
LMI-FYLLYSNXXX	B32	1	0	3	1	3	2	6	1	1
LMI-FYLLYSNXXX	B32	1	1	1	0	3	2	6	1	0
LMI-FYLLYSNXXX	B41	1	0	1	0	3	2	6	1	0
LMI-FYLLYSNXXX	B41	1	1	4	1	3	2	6	1	1
LMI-FYLLYSNXXX	B51	1	0	4	1	4	2	6	1	1
LMI-FYLLYSNXXX	B51	1	1	4	1	4	2	6	1	1
LMI-FYLLYSNXXX	B61	1	0	4	1	4	2	6	1	1
LMI-FYLLYSNXXX	B61	1	1	4	1	4	2	6	1	1
LMI-FYLLYSNXXX	C11	2	0	4	1	2	2	6	1	1
LMI-FYLLYSNXXX	C11	2	1	4	1	2	2	6	1	1
LMI-FYLLYSNXXX	C21	2	0	1	0	2	2	6	1	0
LMI-FYLLYSNXXX	C21	2	1	1	0	2	2	6	1	0
LMI-FYLLYSNXXX	C31	2	0	2	0	3	2	6	1	0
LMI-FYLLYSNXXX	C31	2	1	3	1	3	2	6	1	1
LMI-FYLLYSNXXX	C42	2	0	2	0	3	2	6	1	0
LMI-FYLLYSNXXX	C42	2	1	4	1	3	2	6	1	1
LMI-FYLLYSNXXX	C51	2	0	4	1	4	2	6	1	1
LMI-FYLLYSNXXX	C51	2	1	4	1	4	2	6	1	1
LMI-FYLLYSNXXX	C62	2	0	4	1	4	2	6	1	1
LMI-FYLLYSNXXX	C62	2	1	4	1	4	2	6	1	1
LMI-GCSPEDGAYB	C11	1	0	4	1	2	3	1	1	1
LMI-GCSPEDGAYB	C21	1	0	3	1	2	3	1	1	1
LMI-GCSPEDGAYB	C31	1	0	2	0	3	3	1	1	0
LMI-GCSPEDGAYB	C42	1	0	4	0	3	3	1	1	1
LMI-GCSPEDGAYB	C51	1	0	.	1	4	3	1	1	.
LMI-GCSPEDGAYB	C61	1	0	3	1	4	3	1	1	1
LMI-GEKAAVTQEG	A11	3	0	4	1	2	2	6	0	1
LMI-GEKAAVTQEG	A11	3	1	4	1	2	2	6	0	1
LMI-GEKAAVTQEG	A21	3	0	2	0	2	2	6	0	0
LMI-GEKAAVTQEG	A21	3	1	1	0	2	2	6	0	0
LMI-GEKAAVTQEG	A31	3	0	4	1	3	2	6	0	1
LMI-GEKAAVTQEG	A31	3	1	4	1	3	2	6	0	1
LMI-GEKAAVTQEG	A41	3	0	1	0	3	2	6	0	0
LMI-GEKAAVTQEG	A41	3	1	1	0	3	2	6	0	0
LMI-GEKAAVTQEG	A51	3	0	4	1	4	2	6	0	1
LMI-GEKAAVTQEG	A51	3	1	4	1	4	2	6	0	1
LMI-GEKAAVTQEG	A61	3	0	4	1	4	2	6	0	1
LMI-GEKAAVTQEG	A61	3	1	4	1	4	2	6	0	1
LMI-GEKAAVTQEG	B11	1	0	1	0	2	2	6	0	0
LMI-GEKAAVTQEG	B11	1	1	3	1	2	2	6	0	1
LMI-GEKAAVTQEG	B21	1	0	3	1	2	2	6	0	1
LMI-GEKAAVTQEG	B21	1	1	3	1	2	2	6	0	1
LMI-GEKAAVTQEG	B31	1	0	1	0	3	2	6	0	0
LMI-GEKAAVTQEG	B31	1	1	1	0	3	2	6	0	0
LMI-GEKAAVTQEG	B41	1	0	3	.	3	2	6	0	1
LMI-GEKAAVTQEG	B41	1	1	3	1	3	2	6	0	1
LMI-GEKAAVTQEG	B51	1	0	3	1	4	2	6	0	1
LMI-GEKAAVTQEG	B51	1	1	3	1	4	2	6	0	1
LMI-GEKAAVTQEG	B61	1	0	4	1	4	2	6	0	1
LMI-GEKAAVTQEG	B61	1	1	4	1	4	2	6	0	1
LMI-GEKAAVTQEG	C11	2	0	2	0	2	2	6	0	0
LMI-GEKAAVTQEG	C11	2	1	2	0	2	2	6	0	0
LMI-GEKAAVTQEG	C21	2	0	3	1	2	2	6	0	1
LMI-GEKAAVTQEG	C21	2	1	4	1	2	2	6	0	1
LMI-GEKAAVTQEG	C31	2	0	3	1	3	2	6	0	1
LMI-GEKAAVTQEG	C31	2	1	4	1	3	2	6	0	1
LMI-GEKAAVTQEG	C41	2	0	1	0	3	2	6	0	0
LMI-GEKAAVTQEG	C41	2	1	1	0	3	2	6	0	0
LMI-GEKAAVTQEG	C51	2	0	2	0	4	2	6	0	0
LMI-GEKAAVTQEG	C51	2	1	3	1	4	2	6	0	1
LMI-GEKAAVTQEG	C62	2	0	3	1	4	2	6	0	1
LMI-GEKAAVTQEG	C62	2	1	4	1	4	2	6	0	1
LMI-GPFYXRMCTX	B11	3	0	4	1	2	3	4	1	1
LMI-GPFYXRMCTX	B11	3	1	4	1	2	3	4	1	1
LMI-GPFYXRMCTX	B21	3	0	4	1	2	3	4	1	1
LMI-GPFYXRMCTX	B21	3	1	4	1	2	3	4	1	1
LMI-GPFYXRMCTX	B31	3	0	4	1	3	3	4	1	1
LMI-GPFYXRMCTX	B31	3	1	4	1	3	3	4	1	1
LMI-GPFYXRMCTX	B41	3	0	4	1	3	3	4	1	1
LMI-GPFYXRMCTX	B41	3	1	3	1	3	3	4	1	1
LMI-GPFYXRMCTX	B51	3	0	2	0	4	3	4	1	0
LMI-GPFYXRMCTX	B51	3	1	2	0	4	3	4	1	0
LMI-GPFYXRMCTX	B61	3	0	4	1	4	3	4	1	1
LMI-GPFYXRMCTX	B61	3	1	4	1	4	3	4	1	1
LMI-GPFYXRMCTX	C11	1	0	4	1	2	3	4	1	1
LMI-GPFYXRMCTX	C11	1	1	4	1	2	3	4	1	1
LMI-GPFYXRMCTX	C21	1	0	4	1	2	3	4	1	1
LMI-GPFYXRMCTX	C21	1	1	4	1	2	3	4	1	1
LMI-GPFYXRMCTX	C31	1	0	1	0	3	3	4	1	0
LMI-GPFYXRMCTX	C31	1	1	2	0	3	3	4	1	0
LMI-GPFYXRMCTX	C42	1	0	1	0	3	3	4	1	0
LMI-GPFYXRMCTX	C42	1	1	3	1	3	3	4	1	1
LMI-GPFYXRMCTX	C61	1	0	4	1	4	3	4	1	1
LMI-GPFYXRMCTX	C61	1	1	4	1	4	3	4	1	1
LMI-GTSHBLDFZL	A11	1	0	3	1	2	1	2	1	1
LMI-GTSHBLDFZL	A11	1	1	3	1	2	1	2	1	1
LMI-GTSHBLDFZL	A21	1	0	3	1	2	1	2	1	1
LMI-GTSHBLDFZL	A21	1	1	3	1	2	1	2	1	1
LMI-GTSHBLDFZL	A31	1	0	2	.	3	1	2	1	0
LMI-GTSHBLDFZL	A31	1	1	2	0	3	1	2	1	0
LMI-GTSHBLDFZL	A41	1	0	1	0	3	1	2	1	0
LMI-GTSHBLDFZL	A41	1	1	3	0	3	1	2	1	1
LMI-GTSHBLDFZL	A51	1	0	1	0	4	1	2	1	0
LMI-GTSHBLDFZL	A51	1	1	4	1	4	1	2	1	1
LMI-GTSHBLDFZL	A61	1	0	4	1	4	1	2	1	1
LMI-GTSHBLDFZL	A61	1	1	4	1	4	1	2	1	1
LMI-HJKNPPFCLX	A12	3	0	2	.	2	2	6	0	0
LMI-HJKNPPFCLX	A12	3	1	2	0	2	2	6	0	0
LMI-HJKNPPFCLX	A21	3	0	2	0	2	2	6	0	0
LMI-HJKNPPFCLX	A21	3	1	2	0	2	2	6	0	0
LMI-HJKNPPFCLX	A31	3	0	1	0	3	2	6	0	0
LMI-HJKNPPFCLX	A31	3	1	2	0	3	2	6	0	0
LMI-HJKNPPFCLX	A41	3	0	2	0	3	2	6	0	0
LMI-HJKNPPFCLX	A41	3	1	3	1	3	2	6	0	1
LMI-HJKNPPFCLX	A51	3	0	2	0	4	2	6	0	0
LMI-HJKNPPFCLX	A51	3	1	3	1	4	2	6	0	1
LMI-HJKNPPFCLX	A61	3	0	3	1	4	2	6	0	1
LMI-HJKNPPFCLX	A61	3	1	4	1	4	2	6	0	1
LMI-HJKNPPFCLX	B11	1	0	4	1	2	2	6	0	1
LMI-HJKNPPFCLX	B11	1	1	4	1	2	2	6	0	1
LMI-HJKNPPFCLX	B21	1	0	2	0	2	2	6	0	0
LMI-HJKNPPFCLX	B21	1	1	2	0	2	2	6	0	0
LMI-HJKNPPFCLX	B31	1	0	3	1	3	2	6	0	1
LMI-HJKNPPFCLX	B31	1	1	3	1	3	2	6	0	1
LMI-HJKNPPFCLX	B51	1	0	4	1	4	2	6	0	1
LMI-HJKNPPFCLX	B51	1	1	2	1	4	2	6	0	0
LMI-HJKNPPFCLX	B61	1	0	4	1	4	2	6	0	1
LMI-HJKNPPFCLX	B61	1	1	4	1	4	2	6	0	1
LMI-HJKNPPFCLX	C11	2	0	4	1	2	2	6	0	1
LMI-HJKNPPFCLX	C11	2	1	4	1	2	2	6	0	1
LMI-HJKNPPFCLX	C21	2	0	3	1	2	2	6	0	1
LMI-HJKNPPFCLX	C21	2	1	3	1	2	2	6	0	1
LMI-HJKNPPFCLX	C31	2	0	3	.	3	2	6	0	1
LMI-HJKNPPFCLX	C31	2	1	2	0	3	2	6	0	0
LMI-HJKNPPFCLX	C41	2	0	3	1	3	2	6	0	1
LMI-HJKNPPFCLX	C41	2	1	4	1	3	2	6	0	1
LMI-HJKNPPFCLX	C51	2	0	3	1	4	2	6	0	1
LMI-HJKNPPFCLX	C51	2	1	1	.	4	2	6	0	0
LMI-HJKNPPFCLX	C61	2	0	4	1	4	2	6	0	1
LMI-HJKNPPFCLX	C61	2	1	3	1	4	2	6	0	1
LMI-HMQHEJXBVD	A11	3	0	3	1	2	2	6	0	1
LMI-HMQHEJXBVD	A11	3	1	4	1	2	2	6	0	1
LMI-HMQHEJXBVD	A21	3	0	3	1	2	2	6	0	1
LMI-HMQHEJXBVD	A21	3	1	3	1	2	2	6	0	1
LMI-HMQHEJXBVD	A31	3	0	1	0	3	2	6	0	0
LMI-HMQHEJXBVD	A31	3	1	1	0	3	2	6	0	0
LMI-HMQHEJXBVD	A41	3	0	2	0	3	2	6	0	0
LMI-HMQHEJXBVD	A41	3	1	3	1	3	2	6	0	1
LMI-HMQHEJXBVD	A52	3	0	4	1	4	2	6	0	1
LMI-HMQHEJXBVD	A52	3	1	4	1	4	2	6	0	1
LMI-HMQHEJXBVD	A61	3	0	4	1	4	2	6	0	1
LMI-HMQHEJXBVD	A61	3	1	4	1	4	2	6	0	1
LMI-HMQHEJXBVD	B11	1	0	1	0	2	2	6	0	0
LMI-HMQHEJXBVD	B11	1	1	1	0	2	2	6	0	0
LMI-HMQHEJXBVD	B21	1	0	2	0	2	2	6	0	0
LMI-HMQHEJXBVD	B21	1	1	2	0	2	2	6	0	0
LMI-HMQHEJXBVD	B32	1	0	1	0	3	2	6	0	0
LMI-HMQHEJXBVD	B32	1	1	1	0	3	2	6	0	0
LMI-HMQHEJXBVD	B41	1	0	4	1	3	2	6	0	1
LMI-HMQHEJXBVD	B41	1	1	4	1	3	2	6	0	1
LMI-HMQHEJXBVD	B51	1	0	3	1	4	2	6	0	1
LMI-HMQHEJXBVD	B51	1	1	4	1	4	2	6	0	1
LMI-HMQHEJXBVD	B61	1	0	3	.	4	2	6	0	1
LMI-HMQHEJXBVD	B61	1	1	3	1	4	2	6	0	1
LMI-HMQHEJXBVD	C11	2	0	3	1	2	2	6	0	1
LMI-HMQHEJXBVD	C11	2	1	3	1	2	2	6	0	1
LMI-HMQHEJXBVD	C21	2	0	1	0	2	2	6	0	0
LMI-HMQHEJXBVD	C21	2	1	1	0	2	2	6	0	0
LMI-HMQHEJXBVD	C31	2	0	2	0	3	2	6	0	0
LMI-HMQHEJXBVD	C31	2	1	2	0	3	2	6	0	0
LMI-HMQHEJXBVD	C42	2	0	1	0	3	2	6	0	0
LMI-HMQHEJXBVD	C42	2	1	4	0	3	2	6	0	1
LMI-HMQHEJXBVD	C51	2	0	4	1	4	2	6	0	1
LMI-HMQHEJXBVD	C51	2	1	4	1	4	2	6	0	1
LMI-HMQHEJXBVD	C62	2	0	4	1	4	2	6	0	1
LMI-HMQHEJXBVD	C62	2	1	4	1	4	2	6	0	1
LMI-HRDKHGVQWO	A11	3	0	2	0	2	2	6	1	0
LMI-HRDKHGVQWO	A11	3	1	4	1	2	2	6	1	1
LMI-HRDKHGVQWO	A21	3	0	2	0	2	2	6	1	0
LMI-HRDKHGVQWO	A21	3	1	2	0	2	2	6	1	0
LMI-HRDKHGVQWO	A31	3	0	3	1	3	2	6	1	1
LMI-HRDKHGVQWO	A31	3	1	4	1	3	2	6	1	1
LMI-HRDKHGVQWO	A41	3	0	2	0	3	2	6	1	0
LMI-HRDKHGVQWO	A41	3	1	2	0	3	2	6	1	0
LMI-HRDKHGVQWO	A51	3	0	4	1	4	2	6	1	1
LMI-HRDKHGVQWO	A51	3	1	4	1	4	2	6	1	1
LMI-HRDKHGVQWO	A61	3	0	3	1	4	2	6	1	1
LMI-HRDKHGVQWO	A61	3	1	4	1	4	2	6	1	1
LMI-HRDKHGVQWO	B11	1	0	1	0	2	2	6	1	0
LMI-HRDKHGVQWO	B11	1	1	2	0	2	2	6	1	0
LMI-HRDKHGVQWO	B21	1	0	2	0	2	2	6	1	0
LMI-HRDKHGVQWO	B21	1	1	3	1	2	2	6	1	1
LMI-HRDKHGVQWO	B31	1	0	3	1	3	2	6	1	1
LMI-HRDKHGVQWO	B31	1	1	2	0	3	2	6	1	0
LMI-HRDKHGVQWO	B41	1	0	4	1	3	2	6	1	1
LMI-HRDKHGVQWO	B41	1	1	4	1	3	2	6	1	1
LMI-HRDKHGVQWO	B51	1	0	1	0	4	2	6	1	0
LMI-HRDKHGVQWO	B51	1	1	1	0	4	2	6	1	0
LMI-HRDKHGVQWO	B61	1	0	4	1	4	2	6	1	1
LMI-HRDKHGVQWO	B61	1	1	4	1	4	2	6	1	1
LMI-HRDKHGVQWO	C11	2	0	4	1	2	2	6	1	1
LMI-HRDKHGVQWO	C21	2	0	3	0	2	2	6	1	1
LMI-HRDKHGVQWO	C21	2	1	1	1	2	2	6	1	0
LMI-HRDKHGVQWO	C31	2	0	3	1	3	2	6	1	1
LMI-HRDKHGVQWO	C31	2	1	3	1	3	2	6	1	1
LMI-HRDKHGVQWO	C42	2	0	3	1	3	2	6	1	1
LMI-HRDKHGVQWO	C42	2	1	4	1	3	2	6	1	1
LMI-HRDKHGVQWO	C51	2	0	4	1	4	2	6	1	1
LMI-HRDKHGVQWO	C51	2	1	4	1	4	2	6	1	1
LMI-HRDKHGVQWO	C61	2	0	4	1	4	2	6	1	1
LMI-HRDKHGVQWO	C61	2	1	4	1	4	2	6	1	1
LMI-HXOPKTPJDI	A11	1	0	4	1	2	1	6	0	1
LMI-HXOPKTPJDI	A11	1	1	4	1	2	1	6	0	1
LMI-HXOPKTPJDI	A21	1	0	2	0	2	1	6	0	0
LMI-HXOPKTPJDI	A21	1	1	2	0	2	1	6	0	0
LMI-HXOPKTPJDI	A31	1	0	2	0	3	1	6	0	0
LMI-HXOPKTPJDI	A31	1	1	1	0	3	1	6	0	0
LMI-HXOPKTPJDI	A41	1	0	3	1	3	1	6	0	1
LMI-HXOPKTPJDI	A41	1	1	2	1	3	1	6	0	0
LMI-HXOPKTPJDI	A51	1	0	4	1	4	1	6	0	1
LMI-HXOPKTPJDI	A51	1	1	4	1	4	1	6	0	1
LMI-HXOPKTPJDI	A61	1	0	1	0	4	1	6	0	0
LMI-HXOPKTPJDI	A61	1	1	1	0	4	1	6	0	0
LMI-HXOPKTPJDI	B11	2	0	2	0	2	1	6	0	0
LMI-HXOPKTPJDI	B11	2	1	2	0	2	1	6	0	0
LMI-HXOPKTPJDI	B21	2	0	4	1	2	1	6	0	1
LMI-HXOPKTPJDI	B21	2	1	4	1	2	1	6	0	1
LMI-HXOPKTPJDI	B31	2	0	1	0	3	1	6	0	0
LMI-HXOPKTPJDI	B31	2	1	1	0	3	1	6	0	0
LMI-HXOPKTPJDI	B41	2	0	3	1	3	1	6	0	1
LMI-HXOPKTPJDI	B41	2	1	4	1	3	1	6	0	1
LMI-HXOPKTPJDI	B51	2	0	4	1	4	1	6	0	1
LMI-HXOPKTPJDI	B51	2	1	4	1	4	1	6	0	1
LMI-HXOPKTPJDI	B61	2	0	4	1	4	1	6	0	1
LMI-HXOPKTPJDI	B61	2	1	4	1	4	1	6	0	1
LMI-HXOPKTPJDI	C11	3	0	4	0	2	1	6	0	1
LMI-HXOPKTPJDI	C11	3	1	3	1	2	1	6	0	1
LMI-HXOPKTPJDI	C21	3	0	3	1	2	1	6	0	1
LMI-HXOPKTPJDI	C21	3	1	4	1	2	1	6	0	1
LMI-HXOPKTPJDI	C31	3	0	2	0	3	1	6	0	0
LMI-HXOPKTPJDI	C31	3	1	1	0	3	1	6	0	0
LMI-HXOPKTPJDI	C42	3	0	4	0	3	1	6	0	1
LMI-HXOPKTPJDI	C42	3	1	1	0	3	1	6	0	0
LMI-HXOPKTPJDI	C51	3	0	4	1	4	1	6	0	1
LMI-HXOPKTPJDI	C51	3	1	4	1	4	1	6	0	1
LMI-HXOPKTPJDI	C61	3	0	4	1	4	1	6	0	1
LMI-HXOPKTPJDI	C61	3	1	3	1	4	1	6	0	1
LMI-IEYWWERSFW	B11	3	0	1	0	2	3	4	0	0
LMI-IEYWWERSFW	B11	3	1	2	0	2	3	4	0	0
LMI-IEYWWERSFW	B21	3	0	3	1	2	3	4	0	1
LMI-IEYWWERSFW	B21	3	1	3	1	2	3	4	0	1
LMI-IEYWWERSFW	B31	3	0	1	0	3	3	4	0	0
LMI-IEYWWERSFW	B31	3	1	3	1	3	3	4	0	1
LMI-IEYWWERSFW	B41	3	0	2	.	3	3	4	0	0
LMI-IEYWWERSFW	B41	3	1	2	0	3	3	4	0	0
LMI-IEYWWERSFW	B51	3	0	2	0	4	3	4	0	0
LMI-IEYWWERSFW	B51	3	1	2	0	4	3	4	0	0
LMI-IEYWWERSFW	B61	3	0	4	0	4	3	4	0	1
LMI-IEYWWERSFW	B61	3	1	3	1	4	3	4	0	1
LMI-IEYWWERSFW	C11	1	0	3	1	2	3	4	0	1
LMI-IEYWWERSFW	C11	1	1	3	1	2	3	4	0	1
LMI-IEYWWERSFW	C21	1	0	4	1	2	3	4	0	1
LMI-IEYWWERSFW	C21	1	1	3	0	2	3	4	0	1
LMI-IEYWWERSFW	C31	1	0	1	0	3	3	4	0	0
LMI-IEYWWERSFW	C31	1	1	1	0	3	3	4	0	0
LMI-IEYWWERSFW	C41	1	0	1	0	3	3	4	0	0
LMI-IEYWWERSFW	C41	1	1	1	0	3	3	4	0	0
LMI-IEYWWERSFW	C51	1	0	3	1	4	3	4	0	1
LMI-IEYWWERSFW	C51	1	1	3	1	4	3	4	0	1
LMI-IEYWWERSFW	C62	1	0	3	1	4	3	4	0	1
LMI-IEYWWERSFW	C62	1	1	3	1	4	3	4	0	1
LMI-IJSCMSCFJO	A12	1	0	3	1	2	1	6	1	1
LMI-IJSCMSCFJO	A12	1	1	4	1	2	1	6	1	1
LMI-IJSCMSCFJO	A21	1	0	4	1	2	1	6	1	1
LMI-IJSCMSCFJO	A21	1	1	2	0	2	1	6	1	0
LMI-IJSCMSCFJO	A32	1	0	2	1	3	1	6	1	0
LMI-IJSCMSCFJO	A32	1	1	4	1	3	1	6	1	1
LMI-IJSCMSCFJO	A41	1	0	3	1	3	1	6	1	1
LMI-IJSCMSCFJO	A41	1	1	4	1	3	1	6	1	1
LMI-IJSCMSCFJO	A51	1	0	3	0	4	1	6	1	1
LMI-IJSCMSCFJO	A51	1	1	2	1	4	1	6	1	0
LMI-IJSCMSCFJO	A61	1	0	3	0	4	1	6	1	1
LMI-IJSCMSCFJO	A61	1	1	4	1	4	1	6	1	1
LMI-IJSCMSCFJO	B11	2	0	2	0	2	1	6	1	0
LMI-IJSCMSCFJO	B11	2	1	1	0	2	1	6	1	0
LMI-IJSCMSCFJO	B21	2	0	4	1	2	1	6	1	1
LMI-IJSCMSCFJO	B21	2	1	3	1	2	1	6	1	1
LMI-IJSCMSCFJO	B31	2	0	2	1	3	1	6	1	0
LMI-IJSCMSCFJO	B31	2	1	4	1	3	1	6	1	1
LMI-IJSCMSCFJO	B51	2	0	3	1	4	1	6	1	1
LMI-IJSCMSCFJO	B51	2	1	3	1	4	1	6	1	1
LMI-IJSCMSCFJO	B61	2	0	4	1	4	1	6	1	1
LMI-IJSCMSCFJO	B61	2	1	4	1	4	1	6	1	1
LMI-IJSCMSCFJO	C11	3	0	4	1	2	1	6	1	1
LMI-IJSCMSCFJO	C11	3	1	3	1	2	1	6	1	1
LMI-IJSCMSCFJO	C21	3	0	3	1	2	1	6	1	1
LMI-IJSCMSCFJO	C21	3	1	3	1	2	1	6	1	1
LMI-IJSCMSCFJO	C32	3	0	4	1	3	1	6	1	1
LMI-IJSCMSCFJO	C32	3	1	4	1	3	1	6	1	1
LMI-IJSCMSCFJO	C42	3	0	4	1	3	1	6	1	1
LMI-IJSCMSCFJO	C42	3	1	4	1	3	1	6	1	1
LMI-IJSCMSCFJO	C52	3	0	4	0	4	1	6	1	1
LMI-IJSCMSCFJO	C52	3	1	1	0	4	1	6	1	0
LMI-IJSCMSCFJO	C61	3	0	4	1	4	1	6	1	1
LMI-IJSCMSCFJO	C61	3	1	3	1	4	1	6	1	1
LMI-IKEEEFIOZH	A11	3	0	4	1	2	2	6	1	1
LMI-IKEEEFIOZH	A11	3	1	3	1	2	2	6	1	1
LMI-IKEEEFIOZH	A21	3	0	2	.	2	2	6	1	0
LMI-IKEEEFIOZH	A21	3	1	2	.	2	2	6	1	0
LMI-IKEEEFIOZH	A31	3	0	4	1	3	2	6	1	1
LMI-IKEEEFIOZH	A31	3	1	3	1	3	2	6	1	1
LMI-IKEEEFIOZH	A41	3	0	3	1	3	2	6	1	1
LMI-IKEEEFIOZH	A41	3	1	2	0	3	2	6	1	0
LMI-IKEEEFIOZH	A51	3	0	4	1	4	2	6	1	1
LMI-IKEEEFIOZH	A51	3	1	3	1	4	2	6	1	1
LMI-IKEEEFIOZH	A61	3	0	4	.	4	2	6	1	1
LMI-IKEEEFIOZH	A61	3	1	3	1	4	2	6	1	1
LMI-IKEEEFIOZH	B11	1	0	3	.	2	2	6	1	1
LMI-IKEEEFIOZH	B11	1	1	2	0	2	2	6	1	0
LMI-IKEEEFIOZH	B21	1	0	4	1	2	2	6	1	1
LMI-IKEEEFIOZH	B21	1	1	.	1	2	2	6	1	.
LMI-IKEEEFIOZH	B31	1	0	4	1	3	2	6	1	1
LMI-IKEEEFIOZH	B31	1	1	4	1	3	2	6	1	1
LMI-IKEEEFIOZH	B41	1	0	.	1	3	2	6	1	.
LMI-IKEEEFIOZH	B41	1	1	3	1	3	2	6	1	1
LMI-IKEEEFIOZH	B51	1	0	4	1	4	2	6	1	1
LMI-IKEEEFIOZH	B51	1	1	3	1	4	2	6	1	1
LMI-IKEEEFIOZH	B61	1	0	4	1	4	2	6	1	1
LMI-IKEEEFIOZH	B61	1	1	4	1	4	2	6	1	1
LMI-IKEEEFIOZH	C11	2	0	1	0	2	2	6	1	0
LMI-IKEEEFIOZH	C11	2	1	1	0	2	2	6	1	0
LMI-IKEEEFIOZH	C21	2	0	4	1	2	2	6	1	1
LMI-IKEEEFIOZH	C21	2	1	3	1	2	2	6	1	1
LMI-IKEEEFIOZH	C31	2	0	3	.	3	2	6	1	1
LMI-IKEEEFIOZH	C31	2	1	2	0	3	2	6	1	0
LMI-IKEEEFIOZH	C42	2	0	4	1	3	2	6	1	1
LMI-IKEEEFIOZH	C42	2	1	4	1	3	2	6	1	1
LMI-IKEEEFIOZH	C51	2	0	4	1	4	2	6	1	1
LMI-IKEEEFIOZH	C51	2	1	3	1	4	2	6	1	1
LMI-IKEEEFIOZH	C61	2	0	3	1	4	2	6	1	1
LMI-IKEEEFIOZH	C61	2	1	3	1	4	2	6	1	1
LMI-IXGURVYWOS	A11	3	0	4	1	2	2	6	0	1
LMI-IXGURVYWOS	A11	3	1	4	1	2	2	6	0	1
LMI-IXGURVYWOS	A21	3	0	2	.	2	2	6	0	0
LMI-IXGURVYWOS	A21	3	1	2	0	2	2	6	0	0
LMI-IXGURVYWOS	A32	3	0	2	.	3	2	6	0	0
LMI-IXGURVYWOS	A32	3	1	2	0	3	2	6	0	0
LMI-IXGURVYWOS	A41	3	0	3	1	3	2	6	0	1
LMI-IXGURVYWOS	A41	3	1	3	1	3	2	6	0	1
LMI-IXGURVYWOS	A51	3	0	4	1	4	2	6	0	1
LMI-IXGURVYWOS	A51	3	1	4	1	4	2	6	0	1
LMI-IXGURVYWOS	A61	3	0	4	1	4	2	6	0	1
LMI-IXGURVYWOS	A61	3	1	4	1	4	2	6	0	1
LMI-IXGURVYWOS	B11	1	0	3	1	2	2	6	0	1
LMI-IXGURVYWOS	B11	1	1	4	1	2	2	6	0	1
LMI-IXGURVYWOS	B21	1	0	2	.	2	2	6	0	0
LMI-IXGURVYWOS	B21	1	1	3	1	2	2	6	0	1
LMI-IXGURVYWOS	B31	1	0	3	1	3	2	6	0	1
LMI-IXGURVYWOS	B31	1	1	4	1	3	2	6	0	1
LMI-IXGURVYWOS	B41	1	0	3	.	3	2	6	0	1
LMI-IXGURVYWOS	B41	1	1	2	0	3	2	6	0	0
LMI-IXGURVYWOS	B51	1	0	2	.	4	2	6	0	0
LMI-IXGURVYWOS	B51	1	1	2	0	4	2	6	0	0
LMI-IXGURVYWOS	B61	1	0	4	1	4	2	6	0	1
LMI-IXGURVYWOS	B61	1	1	4	1	4	2	6	0	1
LMI-IXGURVYWOS	C11	2	0	2	0	2	2	6	0	0
LMI-IXGURVYWOS	C11	2	1	2	0	2	2	6	0	0
LMI-IXGURVYWOS	C21	2	0	4	1	2	2	6	0	1
LMI-IXGURVYWOS	C21	2	1	4	1	2	2	6	0	1
LMI-IXGURVYWOS	C32	2	0	3	1	3	2	6	0	1
LMI-IXGURVYWOS	C32	2	1	3	1	3	2	6	0	1
LMI-IXGURVYWOS	C42	2	0	2	0	3	2	6	0	0
LMI-IXGURVYWOS	C42	2	1	1	0	3	2	6	0	0
LMI-IXGURVYWOS	C51	2	0	3	1	4	2	6	0	1
LMI-IXGURVYWOS	C51	2	1	4	1	4	2	6	0	1
LMI-IXGURVYWOS	C61	2	0	4	1	4	2	6	0	1
LMI-IXGURVYWOS	C61	2	1	4	1	4	2	6	0	1
LMI-JEKBIBSSAT	A11	1	0	2	0	2	1	6	1	0
LMI-JEKBIBSSAT	A11	1	1	2	0	2	1	6	1	0
LMI-JEKBIBSSAT	A21	1	0	2	.	2	1	6	1	0
LMI-JEKBIBSSAT	A21	1	1	2	0	2	1	6	1	0
LMI-JEKBIBSSAT	A32	1	0	4	1	3	1	6	1	1
LMI-JEKBIBSSAT	A32	1	1	4	1	3	1	6	1	1
LMI-JEKBIBSSAT	A41	1	0	4	1	3	1	6	1	1
LMI-JEKBIBSSAT	A41	1	1	2	0	3	1	6	1	0
LMI-JEKBIBSSAT	A51	1	0	2	0	4	1	6	1	0
LMI-JEKBIBSSAT	A51	1	1	2	0	4	1	6	1	0
LMI-JEKBIBSSAT	A61	1	0	4	.	4	1	6	1	1
LMI-JEKBIBSSAT	A61	1	1	4	1	4	1	6	1	1
LMI-JEKBIBSSAT	B11	2	0	1	0	2	1	6	1	0
LMI-JEKBIBSSAT	B11	2	1	1	0	2	1	6	1	0
LMI-JEKBIBSSAT	B21	2	0	2	0	2	1	6	1	0
LMI-JEKBIBSSAT	B21	2	1	2	0	2	1	6	1	0
LMI-JEKBIBSSAT	B32	2	0	4	1	3	1	6	1	1
LMI-JEKBIBSSAT	B32	2	1	3	1	3	1	6	1	1
LMI-JEKBIBSSAT	B41	2	0	4	1	3	1	6	1	1
LMI-JEKBIBSSAT	B41	2	1	4	1	3	1	6	1	1
LMI-JEKBIBSSAT	B51	2	0	2	0	4	1	6	1	0
LMI-JEKBIBSSAT	B51	2	1	2	0	4	1	6	1	0
LMI-JEKBIBSSAT	B61	2	0	2	1	4	1	6	1	0
LMI-JEKBIBSSAT	B61	2	1	2	0	4	1	6	1	0
LMI-JEKBIBSSAT	C11	3	0	4	0	2	1	6	1	1
LMI-JEKBIBSSAT	C11	3	1	1	0	2	1	6	1	0
LMI-JEKBIBSSAT	C21	3	0	2	0	2	1	6	1	0
LMI-JEKBIBSSAT	C21	3	1	3	1	2	1	6	1	1
LMI-JEKBIBSSAT	C32	3	0	4	1	3	1	6	1	1
LMI-JEKBIBSSAT	C32	3	1	3	1	3	1	6	1	1
LMI-JEKBIBSSAT	C42	3	0	4	0	3	1	6	1	1
LMI-JEKBIBSSAT	C42	3	1	3	1	3	1	6	1	1
LMI-JEKBIBSSAT	C51	3	0	4	1	4	1	6	1	1
LMI-JEKBIBSSAT	C51	3	1	1	0	4	1	6	1	0
LMI-JEKBIBSSAT	C61	3	0	4	1	4	1	6	1	1
LMI-JEKBIBSSAT	C61	3	1	4	1	4	1	6	1	1
LMI-JEXBTPQTCM	A11	3	0	2	0	2	2	6	0	0
LMI-JEXBTPQTCM	A11	3	1	2	0	2	2	6	0	0
LMI-JEXBTPQTCM	A21	3	0	4	1	2	2	6	0	1
LMI-JEXBTPQTCM	A21	3	1	4	1	2	2	6	0	1
LMI-JEXBTPQTCM	A31	3	0	3	.	3	2	6	0	1
LMI-JEXBTPQTCM	A31	3	1	1	0	3	2	6	0	0
LMI-JEXBTPQTCM	A41	3	0	3	1	3	2	6	0	1
LMI-JEXBTPQTCM	A41	3	1	3	1	3	2	6	0	1
LMI-JEXBTPQTCM	A51	3	0	3	1	4	2	6	0	1
LMI-JEXBTPQTCM	A51	3	1	3	1	4	2	6	0	1
LMI-JEXBTPQTCM	A62	3	0	3	1	4	2	6	0	1
LMI-JEXBTPQTCM	A62	3	1	3	1	4	2	6	0	1
LMI-JEXBTPQTCM	B11	1	0	1	0	2	2	6	0	0
LMI-JEXBTPQTCM	B11	1	1	1	0	2	2	6	0	0
LMI-JEXBTPQTCM	B21	1	0	4	1	2	2	6	0	1
LMI-JEXBTPQTCM	B21	1	1	4	1	2	2	6	0	1
LMI-JEXBTPQTCM	B32	1	0	2	.	3	2	6	0	0
LMI-JEXBTPQTCM	B32	1	1	1	0	3	2	6	0	0
LMI-JEXBTPQTCM	B41	1	0	4	1	3	2	6	0	1
LMI-JEXBTPQTCM	B41	1	1	4	1	3	2	6	0	1
LMI-JEXBTPQTCM	B51	1	0	4	1	4	2	6	0	1
LMI-JEXBTPQTCM	B51	1	1	4	1	4	2	6	0	1
LMI-JEXBTPQTCM	B61	1	0	4	1	4	2	6	0	1
LMI-JEXBTPQTCM	B61	1	1	4	1	4	2	6	0	1
LMI-JEXBTPQTCM	C11	2	0	2	.	2	2	6	0	0
LMI-JEXBTPQTCM	C11	2	1	1	0	2	2	6	0	0
LMI-JEXBTPQTCM	C21	2	0	4	1	2	2	6	0	1
LMI-JEXBTPQTCM	C21	2	1	4	1	2	2	6	0	1
LMI-JEXBTPQTCM	C31	2	0	4	1	3	2	6	0	1
LMI-JEXBTPQTCM	C31	2	1	4	1	3	2	6	0	1
LMI-JEXBTPQTCM	C41	2	0	3	1	3	2	6	0	1
LMI-JEXBTPQTCM	C41	2	1	3	1	3	2	6	0	1
LMI-JEXBTPQTCM	C51	2	0	4	1	4	2	6	0	1
LMI-JEXBTPQTCM	C51	2	1	4	1	4	2	6	0	1
LMI-JGBDSNBQVJ	A11	1	0	3	.	2	1	6	1	1
LMI-JGBDSNBQVJ	A11	1	1	4	1	2	1	6	1	1
LMI-JGBDSNBQVJ	A21	1	0	4	1	2	1	6	1	1
LMI-JGBDSNBQVJ	A21	1	1	4	1	2	1	6	1	1
LMI-JGBDSNBQVJ	A31	1	0	4	1	3	1	6	1	1
LMI-JGBDSNBQVJ	A31	1	1	3	1	3	1	6	1	1
LMI-JGBDSNBQVJ	A41	1	0	2	0	3	1	6	1	0
LMI-JGBDSNBQVJ	A41	1	1	2	0	3	1	6	1	0
LMI-JGBDSNBQVJ	A51	1	0	4	1	4	1	6	1	1
LMI-JGBDSNBQVJ	A51	1	1	4	1	4	1	6	1	1
LMI-JGBDSNBQVJ	A61	1	0	1	0	4	1	6	1	0
LMI-JGBDSNBQVJ	A61	1	1	1	0	4	1	6	1	0
LMI-JGBDSNBQVJ	B11	2	0	1	0	2	1	6	1	0
LMI-JGBDSNBQVJ	B11	2	1	2	0	2	1	6	1	0
LMI-JGBDSNBQVJ	B21	2	0	.	1	2	1	6	1	.
LMI-JGBDSNBQVJ	B21	2	1	4	1	2	1	6	1	1
LMI-JGBDSNBQVJ	B31	2	0	2	0	3	1	6	1	0
LMI-JGBDSNBQVJ	B31	2	1	2	0	3	1	6	1	0
LMI-JGBDSNBQVJ	B41	2	0	3	1	3	1	6	1	1
LMI-JGBDSNBQVJ	B41	2	1	3	1	3	1	6	1	1
LMI-JGBDSNBQVJ	B51	2	0	4	1	4	1	6	1	1
LMI-JGBDSNBQVJ	B51	2	1	4	1	4	1	6	1	1
LMI-JGBDSNBQVJ	B61	2	0	4	1	4	1	6	1	1
LMI-JGBDSNBQVJ	B61	2	1	4	1	4	1	6	1	1
LMI-JGBDSNBQVJ	C11	3	0	2	.	2	1	6	1	0
LMI-JGBDSNBQVJ	C11	3	1	4	1	2	1	6	1	1
LMI-JGBDSNBQVJ	C21	3	0	4	1	2	1	6	1	1
LMI-JGBDSNBQVJ	C21	3	1	4	1	2	1	6	1	1
LMI-JGBDSNBQVJ	C31	3	0	4	.	3	1	6	1	1
LMI-JGBDSNBQVJ	C31	3	1	4	0	3	1	6	1	1
LMI-JGBDSNBQVJ	C42	3	0	3	1	3	1	6	1	1
LMI-JGBDSNBQVJ	C42	3	1	4	0	3	1	6	1	1
LMI-JGBDSNBQVJ	C51	3	0	4	1	4	1	6	1	1
LMI-JGBDSNBQVJ	C51	3	1	4	1	4	1	6	1	1
LMI-JGBDSNBQVJ	C61	3	0	4	1	4	1	6	1	1
LMI-JGBDSNBQVJ	C61	3	1	3	0	4	1	6	1	1
LMI-JGKXEAQRGX	A12	3	0	4	.	2	2	6	1	1
LMI-JGKXEAQRGX	A12	3	1	3	1	2	2	6	1	1
LMI-JGKXEAQRGX	A21	3	0	4	1	2	2	6	1	1
LMI-JGKXEAQRGX	A21	3	1	4	1	2	2	6	1	1
LMI-JGKXEAQRGX	A31	3	0	4	1	3	2	6	1	1
LMI-JGKXEAQRGX	A31	3	1	4	1	3	2	6	1	1
LMI-JGKXEAQRGX	A41	3	0	4	.	3	2	6	1	1
LMI-JGKXEAQRGX	A41	3	1	4	1	3	2	6	1	1
LMI-JGKXEAQRGX	A51	3	0	4	.	4	2	6	1	1
LMI-JGKXEAQRGX	A51	3	1	4	1	4	2	6	1	1
LMI-JGKXEAQRGX	A61	3	0	4	.	4	2	6	1	1
LMI-JGKXEAQRGX	A61	3	1	4	1	4	2	6	1	1
LMI-JGKXEAQRGX	B11	1	0	3	0	2	2	6	1	1
LMI-JGKXEAQRGX	B11	1	1	3	1	2	2	6	1	1
LMI-JGKXEAQRGX	B21	1	0	3	.	2	2	6	1	1
LMI-JGKXEAQRGX	B21	1	1	3	1	2	2	6	1	1
LMI-JGKXEAQRGX	B31	1	0	3	.	3	2	6	1	1
LMI-JGKXEAQRGX	B31	1	1	3	1	3	2	6	1	1
LMI-JGKXEAQRGX	B41	1	0	3	1	3	2	6	1	1
LMI-JGKXEAQRGX	B41	1	1	3	1	3	2	6	1	1
LMI-JGKXEAQRGX	B51	1	0	3	1	4	2	6	1	1
LMI-JGKXEAQRGX	B51	1	1	3	1	4	2	6	1	1
LMI-JGKXEAQRGX	B61	1	0	3	1	4	2	6	1	1
LMI-JGKXEAQRGX	B61	1	1	3	1	4	2	6	1	1
LMI-JGKXEAQRGX	C11	2	0	3	.	2	2	6	1	1
LMI-JGKXEAQRGX	C11	2	1	4	1	2	2	6	1	1
LMI-JGKXEAQRGX	C21	2	0	3	.	2	2	6	1	1
LMI-JGKXEAQRGX	C21	2	1	4	1	2	2	6	1	1
LMI-JGKXEAQRGX	C31	2	0	3	0	3	2	6	1	1
LMI-JGKXEAQRGX	C31	2	1	4	1	3	2	6	1	1
LMI-JGKXEAQRGX	C42	2	0	3	.	3	2	6	1	1
LMI-JGKXEAQRGX	C42	2	1	4	1	3	2	6	1	1
LMI-JGKXEAQRGX	C52	2	0	3	1	4	2	6	1	1
LMI-JGKXEAQRGX	C52	2	1	4	1	4	2	6	1	1
LMI-JGKXEAQRGX	C61	2	0	3	1	4	2	6	1	1
LMI-JGKXEAQRGX	C61	2	1	4	1	4	2	6	1	1
LMI-JVPRRMRVIM	A11	2	0	4	1	2	3	6	1	1
LMI-JVPRRMRVIM	A11	2	1	4	1	2	3	6	1	1
LMI-JVPRRMRVIM	A21	2	0	3	0	2	3	6	1	1
LMI-JVPRRMRVIM	A21	2	1	4	1	2	3	6	1	1
LMI-JVPRRMRVIM	A31	2	0	3	0	3	3	6	1	1
LMI-JVPRRMRVIM	A31	2	1	3	1	3	3	6	1	1
LMI-JVPRRMRVIM	A51	2	0	4	1	4	3	6	1	1
LMI-JVPRRMRVIM	A51	2	1	4	1	4	3	6	1	1
LMI-JVPRRMRVIM	A61	2	0	4	1	4	3	6	1	1
LMI-JVPRRMRVIM	A61	2	1	4	1	4	3	6	1	1
LMI-JVPRRMRVIM	B11	3	0	3	1	2	3	6	1	1
LMI-JVPRRMRVIM	B11	3	1	4	1	2	3	6	1	1
LMI-JVPRRMRVIM	B21	3	0	3	1	2	3	6	1	1
LMI-JVPRRMRVIM	B21	3	1	4	1	2	3	6	1	1
LMI-JVPRRMRVIM	B32	3	0	3	0	3	3	6	1	1
LMI-JVPRRMRVIM	B32	3	1	2	0	3	3	6	1	0
LMI-JVPRRMRVIM	B41	3	0	3	1	3	3	6	1	1
LMI-JVPRRMRVIM	B41	3	1	3	1	3	3	6	1	1
LMI-JVPRRMRVIM	B51	3	0	4	1	4	3	6	1	1
LMI-JVPRRMRVIM	B51	3	1	4	1	4	3	6	1	1
LMI-JVPRRMRVIM	B61	3	0	4	1	4	3	6	1	1
LMI-JVPRRMRVIM	B61	3	1	4	1	4	3	6	1	1
LMI-JVPRRMRVIM	C11	1	0	4	1	2	3	6	1	1
LMI-JVPRRMRVIM	C11	1	1	4	1	2	3	6	1	1
LMI-JVPRRMRVIM	C21	1	0	3	1	2	3	6	1	1
LMI-JVPRRMRVIM	C21	1	1	3	1	2	3	6	1	1
LMI-JVPRRMRVIM	C31	1	0	2	0	3	3	6	1	0
LMI-JVPRRMRVIM	C31	1	1	3	0	3	3	6	1	1
LMI-JVPRRMRVIM	C42	1	0	3	1	3	3	6	1	1
LMI-JVPRRMRVIM	C42	1	1	3	1	3	3	6	1	1
LMI-JVPRRMRVIM	C51	1	0	4	1	4	3	6	1	1
LMI-JVPRRMRVIM	C51	1	1	4	1	4	3	6	1	1
LMI-JVPRRMRVIM	C61	1	0	4	1	4	3	6	1	1
LMI-JVPRRMRVIM	C61	1	1	4	1	4	3	6	1	1
LMI-JXQCJDJYJK	A11	2	0	3	0	2	3	6	0	1
LMI-JXQCJDJYJK	A11	2	1	1	0	2	3	6	0	0
LMI-JXQCJDJYJK	A21	2	0	3	0	2	3	6	0	1
LMI-JXQCJDJYJK	A21	2	1	1	0	2	3	6	0	0
LMI-JXQCJDJYJK	A31	2	0	3	.	3	3	6	0	1
LMI-JXQCJDJYJK	A31	2	1	3	.	3	3	6	0	1
LMI-JXQCJDJYJK	A41	2	0	3	.	3	3	6	0	1
LMI-JXQCJDJYJK	A41	2	1	2	0	3	3	6	0	0
LMI-JXQCJDJYJK	A51	2	0	3	.	4	3	6	0	1
LMI-JXQCJDJYJK	A51	2	1	3	1	4	3	6	0	1
LMI-JXQCJDJYJK	A61	2	0	3	1	4	3	6	0	1
LMI-JXQCJDJYJK	A61	2	1	4	1	4	3	6	0	1
LMI-JXQCJDJYJK	B11	3	0	3	1	2	3	6	0	1
LMI-JXQCJDJYJK	B11	3	1	2	0	2	3	6	0	0
LMI-JXQCJDJYJK	B21	3	0	3	1	2	3	6	0	1
LMI-JXQCJDJYJK	B21	3	1	3	1	2	3	6	0	1
LMI-JXQCJDJYJK	B31	3	0	1	.	3	3	6	0	0
LMI-JXQCJDJYJK	B31	3	1	1	1	3	3	6	0	0
LMI-JXQCJDJYJK	B41	3	0	3	1	3	3	6	0	1
LMI-JXQCJDJYJK	B41	3	1	3	1	3	3	6	0	1
LMI-JXQCJDJYJK	B51	3	0	3	1	4	3	6	0	1
LMI-JXQCJDJYJK	B51	3	1	3	1	4	3	6	0	1
LMI-JXQCJDJYJK	B61	3	0	3	1	4	3	6	0	1
LMI-JXQCJDJYJK	B61	3	1	3	1	4	3	6	0	1
LMI-JXQCJDJYJK	C11	1	0	3	.	2	3	6	0	1
LMI-JXQCJDJYJK	C11	1	1	3	1	2	3	6	0	1
LMI-JXQCJDJYJK	C21	1	0	1	.	2	3	6	0	0
LMI-JXQCJDJYJK	C21	1	1	3	0	2	3	6	0	1
LMI-JXQCJDJYJK	C31	1	0	3	.	3	3	6	0	1
LMI-JXQCJDJYJK	C31	1	1	3	1	3	3	6	0	1
LMI-JXQCJDJYJK	C41	1	0	1	.	3	3	6	0	0
LMI-JXQCJDJYJK	C41	1	1	2	1	3	3	6	0	0
LMI-JXQCJDJYJK	C51	1	0	3	.	4	3	6	0	1
LMI-JXQCJDJYJK	C51	1	1	3	1	4	3	6	0	1
LMI-JXQCJDJYJK	C61	1	0	3	.	4	3	6	0	1
LMI-JXQCJDJYJK	C61	1	1	3	1	4	3	6	0	1
LMI-JZHVFUHCNN	A11	3	0	3	1	2	2	6	0	1
LMI-JZHVFUHCNN	A11	3	1	3	0	2	2	6	0	1
LMI-JZHVFUHCNN	A21	3	0	3	1	2	2	6	0	1
LMI-JZHVFUHCNN	A21	3	1	3	1	2	2	6	0	1
LMI-JZHVFUHCNN	A31	3	0	3	1	3	2	6	0	1
LMI-JZHVFUHCNN	A31	3	1	2	1	3	2	6	0	0
LMI-JZHVFUHCNN	A41	3	0	2	1	3	2	6	0	0
LMI-JZHVFUHCNN	A41	3	1	2	0	3	2	6	0	0
LMI-JZHVFUHCNN	A51	3	0	4	1	4	2	6	0	1
LMI-JZHVFUHCNN	A51	3	1	4	1	4	2	6	0	1
LMI-JZHVFUHCNN	A61	3	0	3	1	4	2	6	0	1
LMI-JZHVFUHCNN	A61	3	1	3	1	4	2	6	0	1
LMI-JZHVFUHCNN	B11	1	0	3	1	2	2	6	0	1
LMI-JZHVFUHCNN	B11	1	1	3	1	2	2	6	0	1
LMI-JZHVFUHCNN	B21	1	0	2	.	2	2	6	0	0
LMI-JZHVFUHCNN	B21	1	1	3	0	2	2	6	0	1
LMI-JZHVFUHCNN	B31	1	0	2	0	3	2	6	0	0
LMI-JZHVFUHCNN	B31	1	1	1	0	3	2	6	0	0
LMI-JZHVFUHCNN	B41	1	0	3	1	3	2	6	0	1
LMI-JZHVFUHCNN	B41	1	1	3	1	3	2	6	0	1
LMI-JZHVFUHCNN	B51	1	0	3	1	4	2	6	0	1
LMI-JZHVFUHCNN	B51	1	1	3	1	4	2	6	0	1
LMI-JZHVFUHCNN	B61	1	0	4	1	4	2	6	0	1
LMI-JZHVFUHCNN	B61	1	1	4	1	4	2	6	0	1
LMI-JZHVFUHCNN	C11	2	0	3	1	2	2	6	0	1
LMI-JZHVFUHCNN	C11	2	1	4	1	2	2	6	0	1
LMI-JZHVFUHCNN	C21	2	0	4	1	2	2	6	0	1
LMI-JZHVFUHCNN	C21	2	1	4	1	2	2	6	0	1
LMI-JZHVFUHCNN	C31	2	0	2	0	3	2	6	0	0
LMI-JZHVFUHCNN	C31	2	1	4	1	3	2	6	0	1
LMI-JZHVFUHCNN	C41	2	0	3	1	3	2	6	0	1
LMI-JZHVFUHCNN	C41	2	1	4	1	3	2	6	0	1
LMI-JZHVFUHCNN	C51	2	0	4	1	4	2	6	0	1
LMI-JZHVFUHCNN	C51	2	1	4	1	4	2	6	0	1
LMI-JZHVFUHCNN	C61	2	0	4	1	4	2	6	0	1
LMI-JZHVFUHCNN	C61	2	1	4	1	4	2	6	0	1
LMI-LDXWPTZVSD	A11	3	0	3	1	2	2	6	0	1
LMI-LDXWPTZVSD	A11	3	1	2	0	2	2	6	0	0
LMI-LDXWPTZVSD	A21	3	0	4	1	2	2	6	0	1
LMI-LDXWPTZVSD	A21	3	1	4	1	2	2	6	0	1
LMI-LDXWPTZVSD	A31	3	0	2	0	3	2	6	0	0
LMI-LDXWPTZVSD	A31	3	1	1	0	3	2	6	0	0
LMI-LDXWPTZVSD	A41	3	0	3	1	3	2	6	0	1
LMI-LDXWPTZVSD	A41	3	1	4	1	3	2	6	0	1
LMI-LDXWPTZVSD	A51	3	0	4	1	4	2	6	0	1
LMI-LDXWPTZVSD	A51	3	1	4	1	4	2	6	0	1
LMI-LDXWPTZVSD	A61	3	0	3	0	4	2	6	0	1
LMI-LDXWPTZVSD	A61	3	1	4	1	4	2	6	0	1
LMI-LDXWPTZVSD	B11	1	0	3	1	2	2	6	0	1
LMI-LDXWPTZVSD	B11	1	1	2	0	2	2	6	0	0
LMI-LDXWPTZVSD	B21	1	0	3	1	2	2	6	0	1
LMI-LDXWPTZVSD	B21	1	1	1	0	2	2	6	0	0
LMI-LDXWPTZVSD	B31	1	0	2	0	3	2	6	0	0
LMI-LDXWPTZVSD	B31	1	1	4	1	3	2	6	0	1
LMI-LDXWPTZVSD	B41	1	0	4	1	3	2	6	0	1
LMI-LDXWPTZVSD	B41	1	1	2	0	3	2	6	0	0
LMI-LDXWPTZVSD	B51	1	0	2	0	4	2	6	0	0
LMI-LDXWPTZVSD	B51	1	1	4	1	4	2	6	0	1
LMI-LDXWPTZVSD	B61	1	0	4	1	4	2	6	0	1
LMI-LDXWPTZVSD	B61	1	1	4	1	4	2	6	0	1
LMI-LDXWPTZVSD	C11	2	0	3	1	2	2	6	0	1
LMI-LDXWPTZVSD	C11	2	1	3	1	2	2	6	0	1
LMI-LDXWPTZVSD	C21	2	0	3	1	2	2	6	0	1
LMI-LDXWPTZVSD	C21	2	1	4	1	2	2	6	0	1
LMI-LDXWPTZVSD	C31	2	0	1	0	3	2	6	0	0
LMI-LDXWPTZVSD	C31	2	1	1	0	3	2	6	0	0
LMI-LDXWPTZVSD	C42	2	0	1	.	3	2	6	0	0
LMI-LDXWPTZVSD	C42	2	1	2	0	3	2	6	0	0
LMI-LDXWPTZVSD	C51	2	0	4	1	4	2	6	0	1
LMI-LDXWPTZVSD	C51	2	1	4	1	4	2	6	0	1
LMI-LDXWPTZVSD	C62	2	0	3	1	4	2	6	0	1
LMI-LDXWPTZVSD	C62	2	1	3	1	4	2	6	0	1
LMI-LFUZTHETZS	C11	1	0	4	1	2	3	1	0	1
LMI-LFUZTHETZS	C21	1	0	2	0	2	3	1	0	0
LMI-LFUZTHETZS	C32	1	0	3	1	3	3	1	0	1
LMI-LFUZTHETZS	C42	1	0	1	0	3	3	1	0	0
LMI-LFUZTHETZS	C51	1	0	3	1	4	3	1	0	1
LMI-LFUZTHETZS	C61	1	0	3	1	4	3	1	0	1
LMI-MNACOENQLY	A11	1	0	3	1	2	1	6	1	1
LMI-MNACOENQLY	A11	1	1	3	1	2	1	6	1	1
LMI-MNACOENQLY	A21	1	0	3	1	2	1	6	1	1
LMI-MNACOENQLY	A21	1	1	3	1	2	1	6	1	1
LMI-MNACOENQLY	A31	1	0	3	1	3	1	6	1	1
LMI-MNACOENQLY	A31	1	1	3	1	3	1	6	1	1
LMI-MNACOENQLY	A51	1	0	3	1	4	1	6	1	1
LMI-MNACOENQLY	A51	1	1	4	1	4	1	6	1	1
LMI-MNACOENQLY	A61	1	0	3	1	4	1	6	1	1
LMI-MNACOENQLY	A61	1	1	2	1	4	1	6	1	0
LMI-MNACOENQLY	B11	2	0	2	.	2	1	6	1	0
LMI-MNACOENQLY	B11	2	1	2	1	2	1	6	1	0
LMI-MNACOENQLY	B21	2	0	3	1	2	1	6	1	1
LMI-MNACOENQLY	B21	2	1	3	1	2	1	6	1	1
LMI-MNACOENQLY	B32	2	0	3	1	3	1	6	1	1
LMI-MNACOENQLY	B32	2	1	4	1	3	1	6	1	1
LMI-MNACOENQLY	B41	2	0	2	0	3	1	6	1	0
LMI-MNACOENQLY	B41	2	1	2	1	3	1	6	1	0
LMI-MNACOENQLY	B51	2	0	3	1	4	1	6	1	1
LMI-MNACOENQLY	B51	2	1	3	1	4	1	6	1	1
LMI-MNACOENQLY	B61	2	0	3	1	4	1	6	1	1
LMI-MNACOENQLY	B61	2	1	3	1	4	1	6	1	1
LMI-MNACOENQLY	C11	3	0	3	1	2	1	6	1	1
LMI-MNACOENQLY	C11	3	1	3	1	2	1	6	1	1
LMI-MNACOENQLY	C21	3	0	3	1	2	1	6	1	1
LMI-MNACOENQLY	C21	3	1	3	1	2	1	6	1	1
LMI-MNACOENQLY	C31	3	0	3	.	3	1	6	1	1
LMI-MNACOENQLY	C31	3	1	4	1	3	1	6	1	1
LMI-MNACOENQLY	C42	3	0	3	1	3	1	6	1	1
LMI-MNACOENQLY	C42	3	1	4	1	3	1	6	1	1
LMI-MNACOENQLY	C51	3	0	3	1	4	1	6	1	1
LMI-MNACOENQLY	C51	3	1	4	1	4	1	6	1	1
LMI-MNACOENQLY	C61	3	0	3	1	4	1	6	1	1
LMI-MNACOENQLY	C61	3	1	3	1	4	1	6	1	1
LMI-MOMISINABQ	B11	1	0	3	1	2	2	1	0	1
LMI-MOMISINABQ	B21	1	0	2	0	2	2	1	0	0
LMI-MOMISINABQ	B31	1	0	2	0	3	2	1	0	0
LMI-MOMISINABQ	B41	1	0	3	1	3	2	1	0	1
LMI-MOMISINABQ	B51	1	0	4	1	4	2	1	0	1
LMI-MOMISINABQ	B61	1	0	4	1	4	2	1	0	1
LMI-MONGRIWBOB	A12	3	0	3	1	2	2	6	0	1
LMI-MONGRIWBOB	A12	3	1	3	1	2	2	6	0	1
LMI-MONGRIWBOB	A21	3	0	3	1	2	2	6	0	1
LMI-MONGRIWBOB	A21	3	1	3	1	2	2	6	0	1
LMI-MONGRIWBOB	A31	3	0	3	1	3	2	6	0	1
LMI-MONGRIWBOB	A31	3	1	3	1	3	2	6	0	1
LMI-MONGRIWBOB	A41	3	0	3	1	3	2	6	0	1
LMI-MONGRIWBOB	A41	3	1	4	1	3	2	6	0	1
LMI-MONGRIWBOB	A51	3	0	3	1	4	2	6	0	1
LMI-MONGRIWBOB	A51	3	1	3	1	4	2	6	0	1
LMI-MONGRIWBOB	A61	3	0	3	1	4	2	6	0	1
LMI-MONGRIWBOB	A61	3	1	3	1	4	2	6	0	1
LMI-MONGRIWBOB	B11	1	0	2	0	2	2	6	0	0
LMI-MONGRIWBOB	B11	1	1	1	1	2	2	6	0	0
LMI-MONGRIWBOB	B21	1	0	3	1	2	2	6	0	1
LMI-MONGRIWBOB	B21	1	1	4	1	2	2	6	0	1
LMI-MONGRIWBOB	B31	1	0	3	.	3	2	6	0	1
LMI-MONGRIWBOB	B31	1	1	3	1	3	2	6	0	1
LMI-MONGRIWBOB	B41	1	0	1	0	3	2	6	0	0
LMI-MONGRIWBOB	B41	1	1	1	1	3	2	6	0	0
LMI-MONGRIWBOB	B51	1	0	3	.	4	2	6	0	1
LMI-MONGRIWBOB	B51	1	1	4	1	4	2	6	0	1
LMI-MONGRIWBOB	B61	1	0	4	1	4	2	6	0	1
LMI-MONGRIWBOB	B61	1	1	4	1	4	2	6	0	1
LMI-MONGRIWBOB	C11	2	0	2	0	2	2	6	0	0
LMI-MONGRIWBOB	C11	2	1	4	1	2	2	6	0	1
LMI-MONGRIWBOB	C21	2	0	3	.	2	2	6	0	1
LMI-MONGRIWBOB	C21	2	1	.	1	2	2	6	0	.
LMI-MONGRIWBOB	C31	2	0	2	0	3	2	6	0	0
LMI-MONGRIWBOB	C31	2	1	4	1	3	2	6	0	1
LMI-MONGRIWBOB	C42	2	0	1	0	3	2	6	0	0
LMI-MONGRIWBOB	C42	2	1	4	1	3	2	6	0	1
LMI-MONGRIWBOB	C52	2	0	3	1	4	2	6	0	1
LMI-MONGRIWBOB	C52	2	1	4	1	4	2	6	0	1
LMI-MONGRIWBOB	C61	2	0	4	1	4	2	6	0	1
LMI-MONGRIWBOB	C61	2	1	4	1	4	2	6	0	1
LMI-MYOXXMDUAV	B11	3	0	3	1	2	3	4	0	1
LMI-MYOXXMDUAV	B11	3	1	4	1	2	3	4	0	1
LMI-MYOXXMDUAV	B21	3	0	4	1	2	3	4	0	1
LMI-MYOXXMDUAV	B21	3	1	3	1	2	3	4	0	1
LMI-MYOXXMDUAV	B31	3	0	2	.	3	3	4	0	0
LMI-MYOXXMDUAV	B31	3	1	2	0	3	3	4	0	0
LMI-MYOXXMDUAV	B41	3	0	2	1	3	3	4	0	0
LMI-MYOXXMDUAV	B41	3	1	4	1	3	3	4	0	1
LMI-MYOXXMDUAV	B51	3	0	4	1	4	3	4	0	1
LMI-MYOXXMDUAV	B51	3	1	4	1	4	3	4	0	1
LMI-MYOXXMDUAV	B61	3	0	4	1	4	3	4	0	1
LMI-MYOXXMDUAV	B61	3	1	4	1	4	3	4	0	1
LMI-MYOXXMDUAV	C11	1	0	4	1	2	3	4	0	1
LMI-MYOXXMDUAV	C11	1	1	4	1	2	3	4	0	1
LMI-MYOXXMDUAV	C31	1	0	2	.	3	3	4	0	0
LMI-MYOXXMDUAV	C31	1	1	2	0	3	3	4	0	0
LMI-MYOXXMDUAV	C41	1	0	4	1	3	3	4	0	1
LMI-MYOXXMDUAV	C41	1	1	4	1	3	3	4	0	1
LMI-MYOXXMDUAV	C51	1	0	4	1	4	3	4	0	1
LMI-MYOXXMDUAV	C51	1	1	4	1	4	3	4	0	1
LMI-NAHOOASAPH	A11	1	0	4	1	2	1	6	0	1
LMI-NAHOOASAPH	A11	1	1	4	1	2	1	6	0	1
LMI-NAHOOASAPH	A31	1	0	4	1	3	1	6	0	1
LMI-NAHOOASAPH	A31	1	1	4	1	3	1	6	0	1
LMI-NAHOOASAPH	A41	1	0	3	1	3	1	6	0	1
LMI-NAHOOASAPH	A41	1	1	4	1	3	1	6	0	1
LMI-NAHOOASAPH	A51	1	0	4	1	4	1	6	0	1
LMI-NAHOOASAPH	A51	1	1	4	1	4	1	6	0	1
LMI-NAHOOASAPH	B11	2	0	3	1	2	1	6	0	1
LMI-NAHOOASAPH	B11	2	1	4	1	2	1	6	0	1
LMI-NAHOOASAPH	B21	2	0	3	1	2	1	6	0	1
LMI-NAHOOASAPH	B21	2	1	4	1	2	1	6	0	1
LMI-NAHOOASAPH	B32	2	0	4	.	3	1	6	0	1
LMI-NAHOOASAPH	B32	2	1	4	1	3	1	6	0	1
LMI-NAHOOASAPH	B41	2	0	2	.	3	1	6	0	0
LMI-NAHOOASAPH	B41	2	1	4	1	3	1	6	0	1
LMI-NAHOOASAPH	B51	2	0	4	1	4	1	6	0	1
LMI-NAHOOASAPH	B51	2	1	4	1	4	1	6	0	1
LMI-NAHOOASAPH	B61	2	0	4	1	4	1	6	0	1
LMI-NAHOOASAPH	B61	2	1	.	1	4	1	6	0	.
LMI-NAHOOASAPH	C11	3	0	4	1	2	1	6	0	1
LMI-NAHOOASAPH	C11	3	1	4	1	2	1	6	0	1
LMI-NAHOOASAPH	C21	3	0	4	1	2	1	6	0	1
LMI-NAHOOASAPH	C21	3	1	4	1	2	1	6	0	1
LMI-NAHOOASAPH	C31	3	0	4	1	3	1	6	0	1
LMI-NAHOOASAPH	C31	3	1	4	1	3	1	6	0	1
LMI-NAHOOASAPH	C42	3	0	4	1	3	1	6	0	1
LMI-NAHOOASAPH	C42	3	1	4	1	3	1	6	0	1
LMI-NAHOOASAPH	C51	3	0	4	1	4	1	6	0	1
LMI-NAHOOASAPH	C51	3	1	4	1	4	1	6	0	1
LMI-NAHOOASAPH	C61	3	0	4	1	4	1	6	0	1
LMI-NAHOOASAPH	C61	3	1	4	1	4	1	6	0	1
LMI-NFNAZTSRSH	B11	1	0	3	1	2	2	1	1	1
LMI-NFNAZTSRSH	B21	1	0	2	0	2	2	1	1	0
LMI-NFNAZTSRSH	B31	1	0	3	1	3	2	1	1	1
LMI-NFNAZTSRSH	B41	1	0	2	0	3	2	1	1	0
LMI-NFNAZTSRSH	B51	1	0	3	1	4	2	1	1	1
LMI-NFNAZTSRSH	B61	1	0	4	1	4	2	1	1	1
LMI-NRBFYICAGP	A11	3	0	3	1	2	2	6	1	1
LMI-NRBFYICAGP	A11	3	1	4	1	2	2	6	1	1
LMI-NRBFYICAGP	A21	3	0	4	1	2	2	6	1	1
LMI-NRBFYICAGP	A21	3	1	3	1	2	2	6	1	1
LMI-NRBFYICAGP	A31	3	0	3	.	3	2	6	1	1
LMI-NRBFYICAGP	A31	3	1	3	1	3	2	6	1	1
LMI-NRBFYICAGP	A41	3	0	4	1	3	2	6	1	1
LMI-NRBFYICAGP	A41	3	1	4	1	3	2	6	1	1
LMI-NRBFYICAGP	A51	3	0	4	1	4	2	6	1	1
LMI-NRBFYICAGP	A51	3	1	4	1	4	2	6	1	1
LMI-NRBFYICAGP	A61	3	0	4	1	4	2	6	1	1
LMI-NRBFYICAGP	A61	3	1	2	0	4	2	6	1	0
LMI-NRBFYICAGP	B11	1	0	4	1	2	2	6	1	1
LMI-NRBFYICAGP	B11	1	1	4	1	2	2	6	1	1
LMI-NRBFYICAGP	B21	1	0	4	1	2	2	6	1	1
LMI-NRBFYICAGP	B21	1	1	3	1	2	2	6	1	1
LMI-NRBFYICAGP	B31	1	0	4	1	3	2	6	1	1
LMI-NRBFYICAGP	B31	1	1	4	1	3	2	6	1	1
LMI-NRBFYICAGP	B41	1	0	4	1	3	2	6	1	1
LMI-NRBFYICAGP	B41	1	1	2	1	3	2	6	1	0
LMI-NRBFYICAGP	B51	1	0	3	1	4	2	6	1	1
LMI-NRBFYICAGP	B51	1	1	2	0	4	2	6	1	0
LMI-NRBFYICAGP	B61	1	0	4	1	4	2	6	1	1
LMI-NRBFYICAGP	B61	1	1	4	1	4	2	6	1	1
LMI-NRBFYICAGP	C11	2	0	3	1	2	2	6	1	1
LMI-NRBFYICAGP	C11	2	1	4	1	2	2	6	1	1
LMI-NRBFYICAGP	C21	2	0	3	1	2	2	6	1	1
LMI-NRBFYICAGP	C21	2	1	4	1	2	2	6	1	1
LMI-NRBFYICAGP	C31	2	0	3	1	3	2	6	1	1
LMI-NRBFYICAGP	C31	2	1	4	1	3	2	6	1	1
LMI-NRBFYICAGP	C42	2	0	2	.	3	2	6	1	0
LMI-NRBFYICAGP	C42	2	1	2	0	3	2	6	1	0
LMI-NRBFYICAGP	C51	2	0	3	1	4	2	6	1	1
LMI-NRBFYICAGP	C51	2	1	4	1	4	2	6	1	1
LMI-NRBFYICAGP	C61	2	0	3	1	4	2	6	1	1
LMI-NRBFYICAGP	C61	2	1	4	1	4	2	6	1	1
LMI-NUPPYQTHES	B11	3	0	3	1	2	3	3	0	1
LMI-NUPPYQTHES	B21	3	0	3	1	2	3	3	0	1
LMI-NUPPYQTHES	B32	3	0	3	1	3	3	3	0	1
LMI-NUPPYQTHES	B41	3	0	4	1	3	3	3	0	1
LMI-NUPPYQTHES	B51	3	0	4	1	4	3	3	0	1
LMI-NUPPYQTHES	B61	3	0	4	1	4	3	3	0	1
LMI-NUPPYQTHES	C11	1	0	3	1	2	3	3	0	1
LMI-NUPPYQTHES	C11	1	1	3	1	2	3	3	0	1
LMI-NUPPYQTHES	C21	1	0	4	1	2	3	3	0	1
LMI-NUPPYQTHES	C21	1	1	3	1	2	3	3	0	1
LMI-NUPPYQTHES	C31	1	0	4	1	3	3	3	0	1
LMI-NUPPYQTHES	C31	1	1	3	1	3	3	3	0	1
LMI-NUPPYQTHES	C42	1	0	3	1	3	3	3	0	1
LMI-NUPPYQTHES	C42	1	1	3	1	3	3	3	0	1
LMI-NUPPYQTHES	C51	1	0	4	1	4	3	3	0	1
LMI-NUPPYQTHES	C51	1	1	2	1	4	3	3	0	0
LMI-NUPPYQTHES	C61	1	0	4	1	4	3	3	0	1
LMI-NUPPYQTHES	C61	1	1	4	1	4	3	3	0	1
LMI-NVQYWROAMO	A11	2	0	4	1	2	3	6	1	1
LMI-NVQYWROAMO	A11	2	1	4	1	2	3	6	1	1
LMI-NVQYWROAMO	A21	2	0	2	0	2	3	6	1	0
LMI-NVQYWROAMO	A21	2	1	2	0	2	3	6	1	0
LMI-NVQYWROAMO	A31	2	0	2	0	3	3	6	1	0
LMI-NVQYWROAMO	A31	2	1	2	0	3	3	6	1	0
LMI-NVQYWROAMO	A41	2	0	2	0	3	3	6	1	0
LMI-NVQYWROAMO	A41	2	1	3	1	3	3	6	1	1
LMI-NVQYWROAMO	A51	2	0	4	1	4	3	6	1	1
LMI-NVQYWROAMO	A51	2	1	.	1	4	3	6	1	.
LMI-NVQYWROAMO	A61	2	0	4	1	4	3	6	1	1
LMI-NVQYWROAMO	A61	2	1	4	1	4	3	6	1	1
LMI-NVQYWROAMO	B11	3	0	3	1	2	3	6	1	1
LMI-NVQYWROAMO	B11	3	1	2	0	2	3	6	1	0
LMI-NVQYWROAMO	B21	3	0	2	0	2	3	6	1	0
LMI-NVQYWROAMO	B21	3	1	2	0	2	3	6	1	0
LMI-NVQYWROAMO	B31	3	0	2	0	3	3	6	1	0
LMI-NVQYWROAMO	B31	3	1	3	1	3	3	6	1	1
LMI-NVQYWROAMO	B41	3	0	2	0	3	3	6	1	0
LMI-NVQYWROAMO	B41	3	1	2	0	3	3	6	1	0
LMI-NVQYWROAMO	B51	3	0	4	1	4	3	6	1	1
LMI-NVQYWROAMO	B51	3	1	4	1	4	3	6	1	1
LMI-NVQYWROAMO	B61	3	0	4	1	4	3	6	1	1
LMI-NVQYWROAMO	B61	3	1	4	1	4	3	6	1	1
LMI-NVQYWROAMO	C11	1	0	4	1	2	3	6	1	1
LMI-NVQYWROAMO	C11	1	1	4	1	2	3	6	1	1
LMI-NVQYWROAMO	C21	1	0	1	0	2	3	6	1	0
LMI-NVQYWROAMO	C21	1	1	2	0	2	3	6	1	0
LMI-NVQYWROAMO	C31	1	0	2	0	3	3	6	1	0
LMI-NVQYWROAMO	C31	1	1	2	0	3	3	6	1	0
LMI-NVQYWROAMO	C41	1	0	2	.	3	3	6	1	0
LMI-NVQYWROAMO	C41	1	1	3	1	3	3	6	1	1
LMI-NVQYWROAMO	C51	1	0	3	.	4	3	6	1	1
LMI-NVQYWROAMO	C51	1	1	2	0	4	3	6	1	0
LMI-NVQYWROAMO	C61	1	0	4	1	4	3	6	1	1
LMI-NVQYWROAMO	C61	1	1	4	1	4	3	6	1	1
LMI-NYRKDAPVQA	A12	3	0	3	1	2	2	6	0	1
LMI-NYRKDAPVQA	A12	3	1	2	0	2	2	6	0	0
LMI-NYRKDAPVQA	A21	3	0	4	1	2	2	6	0	1
LMI-NYRKDAPVQA	A21	3	1	4	1	2	2	6	0	1
LMI-NYRKDAPVQA	A31	3	0	4	1	3	2	6	0	1
LMI-NYRKDAPVQA	A31	3	1	4	1	3	2	6	0	1
LMI-NYRKDAPVQA	A41	3	0	4	1	3	2	6	0	1
LMI-NYRKDAPVQA	A41	3	1	4	1	3	2	6	0	1
LMI-NYRKDAPVQA	A51	3	0	4	1	4	2	6	0	1
LMI-NYRKDAPVQA	A51	3	1	4	1	4	2	6	0	1
LMI-NYRKDAPVQA	A61	3	0	4	1	4	2	6	0	1
LMI-NYRKDAPVQA	A61	3	1	4	1	4	2	6	0	1
LMI-NYRKDAPVQA	B11	1	0	2	1	2	2	6	0	0
LMI-NYRKDAPVQA	B11	1	1	1	0	2	2	6	0	0
LMI-NYRKDAPVQA	B21	1	0	2	.	2	2	6	0	0
LMI-NYRKDAPVQA	B21	1	1	2	1	2	2	6	0	0
LMI-NYRKDAPVQA	B31	1	0	3	1	3	2	6	0	1
LMI-NYRKDAPVQA	B31	1	1	3	1	3	2	6	0	1
LMI-NYRKDAPVQA	B41	1	0	3	1	3	2	6	0	1
LMI-NYRKDAPVQA	B41	1	1	2	1	3	2	6	0	0
LMI-NYRKDAPVQA	B51	1	0	4	1	4	2	6	0	1
LMI-NYRKDAPVQA	B51	1	1	4	1	4	2	6	0	1
LMI-NYRKDAPVQA	B61	1	0	3	1	4	2	6	0	1
LMI-NYRKDAPVQA	B61	1	1	4	1	4	2	6	0	1
LMI-NYRKDAPVQA	C11	2	0	3	1	2	2	6	0	1
LMI-NYRKDAPVQA	C11	2	1	3	1	2	2	6	0	1
LMI-NYRKDAPVQA	C21	2	0	4	1	2	2	6	0	1
LMI-NYRKDAPVQA	C21	2	1	3	1	2	2	6	0	1
LMI-NYRKDAPVQA	C31	2	0	3	.	3	2	6	0	1
LMI-NYRKDAPVQA	C31	2	1	.	0	3	2	6	0	.
LMI-NYRKDAPVQA	C42	2	0	4	1	3	2	6	0	1
LMI-NYRKDAPVQA	C42	2	1	4	1	3	2	6	0	1
LMI-NYRKDAPVQA	C52	2	0	4	1	4	2	6	0	1
LMI-NYRKDAPVQA	C52	2	1	4	1	4	2	6	0	1
LMI-NYRKDAPVQA	C62	2	0	4	1	4	2	6	0	1
LMI-NYRKDAPVQA	C62	2	1	4	1	4	2	6	0	1
LMI-ODRCRNDJDH	A11	2	0	3	1	2	3	3	1	1
LMI-ODRCRNDJDH	A21	2	0	.	1	2	3	3	1	.
LMI-ODRCRNDJDH	A31	2	0	3	1	3	3	3	1	1
LMI-ODRCRNDJDH	A41	2	0	3	1	3	3	3	1	1
LMI-ODRCRNDJDH	A51	2	0	3	1	4	3	3	1	1
LMI-ODRCRNDJDH	A61	2	0	2	0	4	3	3	1	0
LMI-ODRCRNDJDH	C11	1	0	2	0	2	3	3	1	0
LMI-ODRCRNDJDH	C11	1	1	3	1	2	3	3	1	1
LMI-ODRCRNDJDH	C21	1	0	.	0	2	3	3	1	.
LMI-ODRCRNDJDH	C21	1	1	2	0	2	3	3	1	0
LMI-ODRCRNDJDH	C31	1	0	3	1	3	3	3	1	1
LMI-ODRCRNDJDH	C31	1	1	4	1	3	3	3	1	1
LMI-ODRCRNDJDH	C41	1	0	3	1	3	3	3	1	1
LMI-ODRCRNDJDH	C41	1	1	4	1	3	3	3	1	1
LMI-ODRCRNDJDH	C51	1	0	3	1	4	3	3	1	1
LMI-ODRCRNDJDH	C51	1	1	4	1	4	3	3	1	1
LMI-ODRCRNDJDH	C61	1	0	1	0	4	3	3	1	0
LMI-ODRCRNDJDH	C61	1	1	2	0	4	3	3	1	0
LMI-OFWUVHYNKS	A12	3	0	4	1	2	2	6	0	1
LMI-OFWUVHYNKS	A12	3	1	4	1	2	2	6	0	1
LMI-OFWUVHYNKS	A21	3	0	3	1	2	2	6	0	1
LMI-OFWUVHYNKS	A21	3	1	4	1	2	2	6	0	1
LMI-OFWUVHYNKS	A31	3	0	3	0	3	2	6	0	1
LMI-OFWUVHYNKS	A31	3	1	3	1	3	2	6	0	1
LMI-OFWUVHYNKS	A41	3	0	2	0	3	2	6	0	0
LMI-OFWUVHYNKS	A41	3	1	2	0	3	2	6	0	0
LMI-OFWUVHYNKS	A51	3	0	3	1	4	2	6	0	1
LMI-OFWUVHYNKS	A51	3	1	4	1	4	2	6	0	1
LMI-OFWUVHYNKS	A61	3	0	4	1	4	2	6	0	1
LMI-OFWUVHYNKS	A61	3	1	3	1	4	2	6	0	1
LMI-OFWUVHYNKS	B11	1	0	4	1	2	2	6	0	1
LMI-OFWUVHYNKS	B11	1	1	4	1	2	2	6	0	1
LMI-OFWUVHYNKS	B21	1	0	4	.	2	2	6	0	1
LMI-OFWUVHYNKS	B21	1	1	4	1	2	2	6	0	1
LMI-OFWUVHYNKS	B31	1	0	2	0	3	2	6	0	0
LMI-OFWUVHYNKS	B31	1	1	2	0	3	2	6	0	0
LMI-OFWUVHYNKS	B41	1	0	4	1	3	2	6	0	1
LMI-OFWUVHYNKS	B41	1	1	4	1	3	2	6	0	1
LMI-OFWUVHYNKS	B61	1	0	3	1	4	2	6	0	1
LMI-OFWUVHYNKS	B61	1	1	2	1	4	2	6	0	0
LMI-OFWUVHYNKS	C11	2	0	4	1	2	2	6	0	1
LMI-OFWUVHYNKS	C11	2	1	4	1	2	2	6	0	1
LMI-OFWUVHYNKS	C21	2	0	4	1	2	2	6	0	1
LMI-OFWUVHYNKS	C21	2	1	4	.	2	2	6	0	1
LMI-OFWUVHYNKS	C31	2	0	3	1	3	2	6	0	1
LMI-OFWUVHYNKS	C31	2	1	3	1	3	2	6	0	1
LMI-OFWUVHYNKS	C41	2	0	2	0	3	2	6	0	0
LMI-OFWUVHYNKS	C41	2	1	2	0	3	2	6	0	0
LMI-OFWUVHYNKS	C51	2	0	1	0	4	2	6	0	0
LMI-OFWUVHYNKS	C51	2	1	1	0	4	2	6	0	0
LMI-OFWUVHYNKS	C61	2	0	3	1	4	2	6	0	1
LMI-OFWUVHYNKS	C61	2	1	3	1	4	2	6	0	1
LMI-OKYNADWCRK	A11	3	0	4	1	2	2	6	1	1
LMI-OKYNADWCRK	A11	3	1	4	1	2	2	6	1	1
LMI-OKYNADWCRK	A21	3	0	4	.	2	2	6	1	1
LMI-OKYNADWCRK	A21	3	1	.	1	2	2	6	1	.
LMI-OKYNADWCRK	A31	3	0	4	.	3	2	6	1	1
LMI-OKYNADWCRK	A31	3	1	4	1	3	2	6	1	1
LMI-OKYNADWCRK	A41	3	0	4	.	3	2	6	1	1
LMI-OKYNADWCRK	A41	3	1	4	1	3	2	6	1	1
LMI-OKYNADWCRK	A51	3	0	4	.	4	2	6	1	1
LMI-OKYNADWCRK	A51	3	1	3	1	4	2	6	1	1
LMI-OKYNADWCRK	A61	3	0	4	.	4	2	6	1	1
LMI-OKYNADWCRK	A61	3	1	3	1	4	2	6	1	1
LMI-OKYNADWCRK	B12	1	0	4	1	2	2	6	1	1
LMI-OKYNADWCRK	B12	1	1	4	1	2	2	6	1	1
LMI-OKYNADWCRK	B21	1	0	3	.	2	2	6	1	1
LMI-OKYNADWCRK	B21	1	1	4	1	2	2	6	1	1
LMI-OKYNADWCRK	B31	1	0	4	1	3	2	6	1	1
LMI-OKYNADWCRK	B31	1	1	4	1	3	2	6	1	1
LMI-OKYNADWCRK	B41	1	0	3	.	3	2	6	1	1
LMI-OKYNADWCRK	B41	1	1	3	1	3	2	6	1	1
LMI-OKYNADWCRK	B51	1	0	4	.	4	2	6	1	1
LMI-OKYNADWCRK	B51	1	1	4	1	4	2	6	1	1
LMI-OKYNADWCRK	B61	1	0	4	1	4	2	6	1	1
LMI-OKYNADWCRK	B61	1	1	4	1	4	2	6	1	1
LMI-OKYNADWCRK	C11	2	0	2	0	2	2	6	1	0
LMI-OKYNADWCRK	C11	2	1	3	1	2	2	6	1	1
LMI-OKYNADWCRK	C21	2	0	4	1	2	2	6	1	1
LMI-OKYNADWCRK	C21	2	1	4	1	2	2	6	1	1
LMI-OKYNADWCRK	C31	2	0	3	.	3	2	6	1	1
LMI-OKYNADWCRK	C31	2	1	4	1	3	2	6	1	1
LMI-OKYNADWCRK	C42	2	0	4	1	3	2	6	1	1
LMI-OKYNADWCRK	C42	2	1	4	1	3	2	6	1	1
LMI-OKYNADWCRK	C51	2	0	4	1	4	2	6	1	1
LMI-OKYNADWCRK	C51	2	1	4	1	4	2	6	1	1
LMI-OKYNADWCRK	C62	2	0	4	1	4	2	6	1	1
LMI-OKYNADWCRK	C62	2	1	4	1	4	2	6	1	1
LMI-PHXNCSPHYY	A11	1	0	3	.	2	1	6	1	1
LMI-PHXNCSPHYY	A11	1	1	4	1	2	1	6	1	1
LMI-PHXNCSPHYY	A21	1	0	4	1	2	1	6	1	1
LMI-PHXNCSPHYY	A21	1	1	4	1	2	1	6	1	1
LMI-PHXNCSPHYY	A31	1	0	3	.	3	1	6	1	1
LMI-PHXNCSPHYY	A31	1	1	2	0	3	1	6	1	0
LMI-PHXNCSPHYY	A41	1	0	3	.	3	1	6	1	1
LMI-PHXNCSPHYY	A41	1	1	3	1	3	1	6	1	1
LMI-PHXNCSPHYY	A51	1	0	4	1	4	1	6	1	1
LMI-PHXNCSPHYY	A51	1	1	4	1	4	1	6	1	1
LMI-PHXNCSPHYY	A61	1	0	3	.	4	1	6	1	1
LMI-PHXNCSPHYY	A61	1	1	3	1	4	1	6	1	1
LMI-PHXNCSPHYY	B11	2	0	2	0	2	1	6	1	0
LMI-PHXNCSPHYY	B11	2	1	2	0	2	1	6	1	0
LMI-PHXNCSPHYY	B21	2	0	3	1	2	1	6	1	1
LMI-PHXNCSPHYY	B21	2	1	4	1	2	1	6	1	1
LMI-PHXNCSPHYY	B31	2	0	3	1	3	1	6	1	1
LMI-PHXNCSPHYY	B31	2	1	4	1	3	1	6	1	1
LMI-PHXNCSPHYY	B41	2	0	4	1	3	1	6	1	1
LMI-PHXNCSPHYY	B41	2	1	4	1	3	1	6	1	1
LMI-PHXNCSPHYY	B51	2	0	4	1	4	1	6	1	1
LMI-PHXNCSPHYY	B51	2	1	4	1	4	1	6	1	1
LMI-PHXNCSPHYY	B61	2	0	4	1	4	1	6	1	1
LMI-PHXNCSPHYY	B61	2	1	3	1	4	1	6	1	1
LMI-PHXNCSPHYY	C11	3	0	3	1	2	1	6	1	1
LMI-PHXNCSPHYY	C11	3	1	4	1	2	1	6	1	1
LMI-PHXNCSPHYY	C21	3	0	3	1	2	1	6	1	1
LMI-PHXNCSPHYY	C21	3	1	4	1	2	1	6	1	1
LMI-PHXNCSPHYY	C31	3	0	3	1	3	1	6	1	1
LMI-PHXNCSPHYY	C31	3	1	3	1	3	1	6	1	1
LMI-PHXNCSPHYY	C41	3	0	3	1	3	1	6	1	1
LMI-PHXNCSPHYY	C41	3	1	3	1	3	1	6	1	1
LMI-PHXNCSPHYY	C51	3	0	3	1	4	1	6	1	1
LMI-PHXNCSPHYY	C51	3	1	4	1	4	1	6	1	1
LMI-PHXNCSPHYY	C61	3	0	3	1	4	1	6	1	1
LMI-PHXNCSPHYY	C61	3	1	4	1	4	1	6	1	1
LMI-PUQMTCIDFU	A11	2	0	4	1	2	3	5	0	1
LMI-PUQMTCIDFU	A11	2	1	4	1	2	3	5	0	1
LMI-PUQMTCIDFU	A21	2	0	4	1	2	3	5	0	1
LMI-PUQMTCIDFU	A21	2	1	4	1	2	3	5	0	1
LMI-PUQMTCIDFU	A31	2	0	4	1	3	3	5	0	1
LMI-PUQMTCIDFU	A31	2	1	4	1	3	3	5	0	1
LMI-PUQMTCIDFU	A41	2	0	4	1	3	3	5	0	1
LMI-PUQMTCIDFU	A41	2	1	4	1	3	3	5	0	1
LMI-PUQMTCIDFU	A51	2	0	4	1	4	3	5	0	1
LMI-PUQMTCIDFU	A51	2	1	4	1	4	3	5	0	1
LMI-PUQMTCIDFU	A61	2	0	4	1	4	3	5	0	1
LMI-PUQMTCIDFU	A61	2	1	4	1	4	3	5	0	1
LMI-PUQMTCIDFU	B11	3	0	4	1	2	3	5	0	1
LMI-PUQMTCIDFU	B21	3	0	4	1	2	3	5	0	1
LMI-PUQMTCIDFU	B31	3	0	4	1	3	3	5	0	1
LMI-PUQMTCIDFU	B41	3	0	4	1	3	3	5	0	1
LMI-PUQMTCIDFU	B51	3	0	4	1	4	3	5	0	1
LMI-PUQMTCIDFU	B61	3	0	4	1	4	3	5	0	1
LMI-PUQMTCIDFU	C11	1	0	4	1	2	3	5	0	1
LMI-PUQMTCIDFU	C11	1	1	4	1	2	3	5	0	1
LMI-PUQMTCIDFU	C21	1	0	4	1	2	3	5	0	1
LMI-PUQMTCIDFU	C21	1	1	4	1	2	3	5	0	1
LMI-PUQMTCIDFU	C31	1	0	4	1	3	3	5	0	1
LMI-PUQMTCIDFU	C31	1	1	4	1	3	3	5	0	1
LMI-PUQMTCIDFU	C41	1	0	4	1	3	3	5	0	1
LMI-PUQMTCIDFU	C41	1	1	4	1	3	3	5	0	1
LMI-PUQMTCIDFU	C51	1	0	4	1	4	3	5	0	1
LMI-PUQMTCIDFU	C51	1	1	4	1	4	3	5	0	1
LMI-PUQMTCIDFU	C61	1	0	4	1	4	3	5	0	1
LMI-PUQMTCIDFU	C61	1	1	4	1	4	3	5	0	1
LMI-QAAWWWZSIH	A11	3	0	2	0	2	2	6	0	0
LMI-QAAWWWZSIH	A11	3	1	3	1	2	2	6	0	1
LMI-QAAWWWZSIH	A21	3	0	3	1	2	2	6	0	1
LMI-QAAWWWZSIH	A21	3	1	3	1	2	2	6	0	1
LMI-QAAWWWZSIH	A31	3	0	2	.	3	2	6	0	0
LMI-QAAWWWZSIH	A31	3	1	3	0	3	2	6	0	1
LMI-QAAWWWZSIH	A41	3	0	2	0	3	2	6	0	0
LMI-QAAWWWZSIH	A41	3	1	2	0	3	2	6	0	0
LMI-QAAWWWZSIH	A51	3	0	3	1	4	2	6	0	1
LMI-QAAWWWZSIH	A51	3	1	3	1	4	2	6	0	1
LMI-QAAWWWZSIH	A62	3	0	3	1	4	2	6	0	1
LMI-QAAWWWZSIH	A62	3	1	3	1	4	2	6	0	1
LMI-QAAWWWZSIH	B11	1	0	1	0	2	2	6	0	0
LMI-QAAWWWZSIH	B11	1	1	2	0	2	2	6	0	0
LMI-QAAWWWZSIH	B21	1	0	3	1	2	2	6	0	1
LMI-QAAWWWZSIH	B21	1	1	3	1	2	2	6	0	1
LMI-QAAWWWZSIH	B31	1	0	2	0	3	2	6	0	0
LMI-QAAWWWZSIH	B31	1	1	2	0	3	2	6	0	0
LMI-QAAWWWZSIH	B41	1	0	1	0	3	2	6	0	0
LMI-QAAWWWZSIH	B41	1	1	2	0	3	2	6	0	0
LMI-QAAWWWZSIH	B51	1	0	3	1	4	2	6	0	1
LMI-QAAWWWZSIH	B51	1	1	3	1	4	2	6	0	1
LMI-QAAWWWZSIH	B61	1	0	3	1	4	2	6	0	1
LMI-QAAWWWZSIH	B61	1	1	3	1	4	2	6	0	1
LMI-QAAWWWZSIH	C11	2	0	3	1	2	2	6	0	1
LMI-QAAWWWZSIH	C11	2	1	3	1	2	2	6	0	1
LMI-QAAWWWZSIH	C21	2	0	4	1	2	2	6	0	1
LMI-QAAWWWZSIH	C21	2	1	4	1	2	2	6	0	1
LMI-QAAWWWZSIH	C31	2	0	3	1	3	2	6	0	1
LMI-QAAWWWZSIH	C31	2	1	2	0	3	2	6	0	0
LMI-QAAWWWZSIH	C42	2	0	3	1	3	2	6	0	1
LMI-QAAWWWZSIH	C42	2	1	2	1	3	2	6	0	0
LMI-QAAWWWZSIH	C51	2	0	4	1	4	2	6	0	1
LMI-QAAWWWZSIH	C51	2	1	3	1	4	2	6	0	1
LMI-QDXYGPUJSE	A11	3	0	4	1	2	2	5	0	1
LMI-QDXYGPUJSE	A21	3	0	3	1	2	2	5	0	1
LMI-QDXYGPUJSE	A31	3	0	3	1	3	2	5	0	1
LMI-QDXYGPUJSE	A41	3	0	3	1	3	2	5	0	1
LMI-QDXYGPUJSE	A51	3	0	4	1	4	2	5	0	1
LMI-QDXYGPUJSE	A61	3	0	4	1	4	2	5	0	1
LMI-QDXYGPUJSE	B11	1	0	4	0	2	2	5	0	1
LMI-QDXYGPUJSE	B11	1	1	4	1	2	2	5	0	1
LMI-QDXYGPUJSE	B21	1	0	4	0	2	2	5	0	1
LMI-QDXYGPUJSE	B21	1	1	2	0	2	2	5	0	0
LMI-QDXYGPUJSE	B31	1	0	4	1	3	2	5	0	1
LMI-QDXYGPUJSE	B31	1	1	4	1	3	2	5	0	1
LMI-QDXYGPUJSE	B41	1	0	4	1	3	2	5	0	1
LMI-QDXYGPUJSE	B41	1	1	4	1	3	2	5	0	1
LMI-QDXYGPUJSE	B51	1	0	4	1	4	2	5	0	1
LMI-QDXYGPUJSE	B51	1	1	4	1	4	2	5	0	1
LMI-QDXYGPUJSE	B61	1	0	4	1	4	2	5	0	1
LMI-QDXYGPUJSE	B61	1	1	4	1	4	2	5	0	1
LMI-QDXYGPUJSE	C11	2	0	4	1	2	2	5	0	1
LMI-QDXYGPUJSE	C11	2	1	4	1	2	2	5	0	1
LMI-QDXYGPUJSE	C21	2	0	3	1	2	2	5	0	1
LMI-QDXYGPUJSE	C21	2	1	4	1	2	2	5	0	1
LMI-QDXYGPUJSE	C31	2	0	2	0	3	2	5	0	0
LMI-QDXYGPUJSE	C31	2	1	2	0	3	2	5	0	0
LMI-QDXYGPUJSE	C42	2	0	4	1	3	2	5	0	1
LMI-QDXYGPUJSE	C42	2	1	4	1	3	2	5	0	1
LMI-QDXYGPUJSE	C51	2	0	4	1	4	2	5	0	1
LMI-QDXYGPUJSE	C51	2	1	4	1	4	2	5	0	1
LMI-QDXYGPUJSE	C62	2	0	4	1	4	2	5	0	1
LMI-QDXYGPUJSE	C62	2	1	4	1	4	2	5	0	1
LMI-QHNOHBPJCM	A11	3	0	3	0	2	2	6	1	1
LMI-QHNOHBPJCM	A11	3	1	3	1	2	2	6	1	1
LMI-QHNOHBPJCM	A21	3	0	3	1	2	2	6	1	1
LMI-QHNOHBPJCM	A21	3	1	3	1	2	2	6	1	1
LMI-QHNOHBPJCM	A31	3	0	4	1	3	2	6	1	1
LMI-QHNOHBPJCM	A31	3	1	3	1	3	2	6	1	1
LMI-QHNOHBPJCM	A41	3	0	3	1	3	2	6	1	1
LMI-QHNOHBPJCM	A41	3	1	3	1	3	2	6	1	1
LMI-QHNOHBPJCM	A51	3	0	4	1	4	2	6	1	1
LMI-QHNOHBPJCM	A51	3	1	3	1	4	2	6	1	1
LMI-QHNOHBPJCM	A61	3	0	4	1	4	2	6	1	1
LMI-QHNOHBPJCM	A61	3	1	3	1	4	2	6	1	1
LMI-QHNOHBPJCM	B12	1	0	2	0	2	2	6	1	0
LMI-QHNOHBPJCM	B12	1	1	2	0	2	2	6	1	0
LMI-QHNOHBPJCM	B21	1	0	1	0	2	2	6	1	0
LMI-QHNOHBPJCM	B21	1	1	2	0	2	2	6	1	0
LMI-QHNOHBPJCM	B31	1	0	3	1	3	2	6	1	1
LMI-QHNOHBPJCM	B31	1	1	3	1	3	2	6	1	1
LMI-QHNOHBPJCM	B41	1	0	2	.	3	2	6	1	0
LMI-QHNOHBPJCM	B41	1	1	2	0	3	2	6	1	0
LMI-QHNOHBPJCM	B51	1	0	2	1	4	2	6	1	0
LMI-QHNOHBPJCM	B51	1	1	3	1	4	2	6	1	1
LMI-QHNOHBPJCM	B61	1	0	4	1	4	2	6	1	1
LMI-QHNOHBPJCM	B61	1	1	3	1	4	2	6	1	1
LMI-QHNOHBPJCM	C11	2	0	3	1	2	2	6	1	1
LMI-QHNOHBPJCM	C11	2	1	3	1	2	2	6	1	1
LMI-QHNOHBPJCM	C21	2	0	3	1	2	2	6	1	1
LMI-QHNOHBPJCM	C21	2	1	3	1	2	2	6	1	1
LMI-QHNOHBPJCM	C31	2	0	3	.	3	2	6	1	1
LMI-QHNOHBPJCM	C31	2	1	3	1	3	2	6	1	1
LMI-QHNOHBPJCM	C42	2	0	4	1	3	2	6	1	1
LMI-QHNOHBPJCM	C42	2	1	4	1	3	2	6	1	1
LMI-QHNOHBPJCM	C51	2	0	4	1	4	2	6	1	1
LMI-QHNOHBPJCM	C51	2	1	4	1	4	2	6	1	1
LMI-QHNOHBPJCM	C62	2	0	4	1	4	2	6	1	1
LMI-QHNOHBPJCM	C62	2	1	4	1	4	2	6	1	1
LMI-QPWBYYHCIF	A11	3	0	3	1	2	2	4	1	1
LMI-QPWBYYHCIF	A11	3	1	3	1	2	2	4	1	1
LMI-QPWBYYHCIF	A21	3	0	3	1	2	2	4	1	1
LMI-QPWBYYHCIF	A21	3	1	3	1	2	2	4	1	1
LMI-QPWBYYHCIF	A31	3	0	3	1	3	2	4	1	1
LMI-QPWBYYHCIF	A31	3	1	3	1	3	2	4	1	1
LMI-QPWBYYHCIF	A41	3	0	2	0	3	2	4	1	0
LMI-QPWBYYHCIF	A41	3	1	1	0	3	2	4	1	0
LMI-QPWBYYHCIF	A51	3	0	3	1	4	2	4	1	1
LMI-QPWBYYHCIF	A51	3	1	3	1	4	2	4	1	1
LMI-QPWBYYHCIF	A61	3	0	3	1	4	2	4	1	1
LMI-QPWBYYHCIF	A61	3	1	3	1	4	2	4	1	1
LMI-QPWBYYHCIF	B11	1	0	2	0	2	2	4	1	0
LMI-QPWBYYHCIF	B11	1	1	3	0	2	2	4	1	1
LMI-QPWBYYHCIF	B21	1	0	3	1	2	2	4	1	1
LMI-QPWBYYHCIF	B21	1	1	4	1	2	2	4	1	1
LMI-QPWBYYHCIF	B31	1	0	2	0	3	2	4	1	0
LMI-QPWBYYHCIF	B31	1	1	2	0	3	2	4	1	0
LMI-QPWBYYHCIF	B41	1	0	4	1	3	2	4	1	1
LMI-QPWBYYHCIF	B41	1	1	4	1	3	2	4	1	1
LMI-QPWBYYHCIF	B51	1	0	4	1	4	2	4	1	1
LMI-QPWBYYHCIF	B51	1	1	4	1	4	2	4	1	1
LMI-QPWBYYHCIF	B61	1	0	4	1	4	2	4	1	1
LMI-QPWBYYHCIF	B61	1	1	4	1	4	2	4	1	1
LMI-QUCERQVGKI	A11	2	0	3	1	2	3	6	0	1
LMI-QUCERQVGKI	A11	2	1	3	1	2	3	6	0	1
LMI-QUCERQVGKI	A32	2	0	1	0	3	3	6	0	0
LMI-QUCERQVGKI	A32	2	1	1	0	3	3	6	0	0
LMI-QUCERQVGKI	A41	2	0	1	0	3	3	6	0	0
LMI-QUCERQVGKI	A41	2	1	.	0	3	3	6	0	.
LMI-QUCERQVGKI	A52	2	0	3	1	4	3	6	0	1
LMI-QUCERQVGKI	A52	2	1	3	1	4	3	6	0	1
LMI-QUCERQVGKI	A61	2	0	3	.	4	3	6	0	1
LMI-QUCERQVGKI	A61	2	1	4	1	4	3	6	0	1
LMI-QUCERQVGKI	B11	3	0	2	0	2	3	6	0	0
LMI-QUCERQVGKI	B11	3	1	4	1	2	3	6	0	1
LMI-QUCERQVGKI	B21	3	0	2	0	2	3	6	0	0
LMI-QUCERQVGKI	B21	3	1	1	0	2	3	6	0	0
LMI-QUCERQVGKI	B32	3	0	2	1	3	3	6	0	0
LMI-QUCERQVGKI	B32	3	1	2	0	3	3	6	0	0
LMI-QUCERQVGKI	B51	3	0	2	0	4	3	6	0	0
LMI-QUCERQVGKI	B51	3	1	1	0	4	3	6	0	0
LMI-QUCERQVGKI	B62	3	0	2	0	4	3	6	0	0
LMI-QUCERQVGKI	B62	3	1	1	0	4	3	6	0	0
LMI-QUCERQVGKI	C11	1	0	2	0	2	3	6	0	0
LMI-QUCERQVGKI	C11	1	1	1	0	2	3	6	0	0
LMI-QUCERQVGKI	C32	1	0	1	.	3	3	6	0	0
LMI-QUCERQVGKI	C32	1	1	1	0	3	3	6	0	0
LMI-QUCERQVGKI	C42	1	0	2	.	3	3	6	0	0
LMI-QUCERQVGKI	C42	1	1	4	1	3	3	6	0	1
LMI-QUCERQVGKI	C51	1	0	4	1	4	3	6	0	1
LMI-QUCERQVGKI	C51	1	1	4	1	4	3	6	0	1
LMI-QWIFGCREAZ	A11	1	0	3	.	2	1	3	1	1
LMI-QWIFGCREAZ	A11	1	1	4	1	2	1	3	1	1
LMI-QWIFGCREAZ	A21	1	0	4	1	2	1	3	1	1
LMI-QWIFGCREAZ	A21	1	1	3	1	2	1	3	1	1
LMI-QWIFGCREAZ	A31	1	0	3	.	3	1	3	1	1
LMI-QWIFGCREAZ	A31	1	1	2	0	3	1	3	1	0
LMI-QWIFGCREAZ	A41	1	0	4	1	3	1	3	1	1
LMI-QWIFGCREAZ	A41	1	1	4	1	3	1	3	1	1
LMI-QWIFGCREAZ	A51	1	0	4	1	4	1	3	1	1
LMI-QWIFGCREAZ	A51	1	1	4	1	4	1	3	1	1
LMI-QWIFGCREAZ	A61	1	0	4	1	4	1	3	1	1
LMI-QWIFGCREAZ	A61	1	1	4	1	4	1	3	1	1
LMI-QWIFGCREAZ	B11	2	0	4	1	2	1	3	1	1
LMI-QWIFGCREAZ	B21	2	0	3	1	2	1	3	1	1
LMI-QWIFGCREAZ	B32	2	0	3	.	3	1	3	1	1
LMI-QWIFGCREAZ	B41	2	0	3	1	3	1	3	1	1
LMI-QWIFGCREAZ	B51	2	0	4	1	4	1	3	1	1
LMI-QWIFGCREAZ	B61	2	0	4	1	4	1	3	1	1
[truncated: 1,168 more rows]
